# Supplementary material for: Preparation of polynuclear NHC complexes by post-synthetic modification of half-sandwich rhodium and iridium complexes bearing C-azolato ligands
Source: Royal Society of Chemistry journal article supplement (doi:10.1039/c8dt02212g), 2018-01-01
Supplement: c8dt02212g1.pdf [file c8dt02212g1.pdf]

Supporting Information belonging to publication

**Preparation of Polynuclear NHC Complexes by Post-Synthetic Modification of Half-Sandwich Rhodium and Iridium Complexes Bearing C-Azolato Ligands**

Francisco Aznarez,<sup>a</sup> Wen-Xi Gao,<sup>a</sup> Yue-Jian Lin,<sup>a</sup> F. Ekkehardt Hahn,<sup>\*,a,b</sup> and Guo-Xin Jin<sup>\*,a</sup>

<sup>a</sup>Shanghai Key Laboratory of Molecular Catalysis and Innovative Materials, State Key Laboratory of Molecular Engineering of Polymers, Collaborative Innovation Center of Chemistry for Energy Materials, Department of Chemistry, Fudan University, Shanghai 200438, P. R. China.

<sup>b</sup>Institut für Anorganische und Analytische Chemie, Westfälische Wilhelms-Universität Münster, Corrensstraße 30, D-48149 Münster, Germany.

**Table of Contents:**

|                                                                      |     |
|----------------------------------------------------------------------|-----|
| 1. General Procedures                                                | S2  |
| 2. X-ray Diffraction Studies (XRD)                                   | S2  |
| 3. NMR Spectra                                                       | S8  |
| 4. Addition of Br <sub>2</sub> to <i>trans</i> -1,4-dibromo-2-butene | S23 |
| 5. HR-ESI Mass Spectra                                               | S24 |
| 6. References                                                        | S31 |

## 1. General Procedures

All manipulations were carried out under an argon atmosphere using standard Schlenk techniques. Glassware was oven dried at 100 °C. Solvents were distilled by standard procedures prior to use.  $^1\text{H}$  and  $^{13}\text{C}\{^1\text{H}\}$  NMR spectra were recorded at 298 K on Bruker AVANCE I 400 or VANCE-DMX 500 spectrometers. Chemical shifts ( $\delta$ ) are expressed in ppm downfield from tetramethylsilane or using the residual protonated solvent as an internal standard. All coupling constants are expressed in Hertz. For assignment of the NMR resonances see the numbering scheme at the molecular plots. Mass spectra were obtained with a Micro TOF II spectrometer. 1,4-Dibromobutane, *trans*-1,4-dibromo-2-butene, 1,4-bis(bromomethyl)benzene, 1,3,5-tris(bromomethyl)benzene and  $\text{Br}_2$  were used as received from commercial sources. Complexes **1** and **2** were prepared as described previously in the literature.<sup>1</sup> Satisfactory microanalytical data for complexes **3Br–12Br<sub>3</sub>** could not be obtained due to the fluorine content. The record of a satisfactory  $^{13}\text{C}\{^1\text{H}\}$  NMR spectrum of **11Br<sub>2</sub>** was not possible due to the low solubility of the complex in all the common solvents used in a laboratory.

## 2. X-Ray Diffraction Studies (XRD)

X-Ray diffraction data (XRD) for compounds **3Br·2CH<sub>2</sub>Cl<sub>2</sub>**, **4Br**, **5Br·CH<sub>2</sub>Cl<sub>2</sub>·H<sub>2</sub>O**, **7Br<sub>2</sub>·4CH<sub>2</sub>Cl<sub>2</sub>**, **8Br<sub>2</sub>·4CH<sub>2</sub>Cl<sub>2</sub>**, **9Br<sub>2</sub>·4CH<sub>2</sub>Cl<sub>2</sub>** and **11Br<sub>2</sub>** were recorded on a Bruker APEX-II diffractometer equipped with an area detector and graphite monochromated Mo-K $\alpha$  radiation ( $\lambda = 0.71073 \text{ \AA}$ ). The data reduction was performed using the APEX software.<sup>2</sup> The structure was refined by full-matrix least-squares methods based on  $F^2$  using SHELXL-2014/7.<sup>3</sup> Hydrogen atoms were positioned geometrically in idealized positions and refined with isotropic displacement parameters as riding atoms. If not noted otherwise all on-hydrogen atoms were refined anisotropically. Geometrical calculations were performed using the SHELXL-2014/7 program.<sup>3</sup>

**Table S1.** Crystallographic data and structure refinement parameters for complexes **3Br·2CH<sub>2</sub>Cl<sub>2</sub>**, **4Br**, **5Br·CH<sub>2</sub>Cl<sub>2</sub>·H<sub>2</sub>O**.

|                                                                                                  | <b>3Br·2CH<sub>2</sub>Cl<sub>2</sub></b>                                          | <b>4Br</b>                                                                        | <b>5Br·CH<sub>2</sub>Cl<sub>2</sub>·H<sub>2</sub>O</b>                              |
|--------------------------------------------------------------------------------------------------|-----------------------------------------------------------------------------------|-----------------------------------------------------------------------------------|-------------------------------------------------------------------------------------|
| formula                                                                                          | C <sub>30</sub> H <sub>35</sub> Br <sub>3</sub> Cl <sub>8</sub> FIrN <sub>4</sub> | C <sub>28</sub> H <sub>29</sub> Br <sub>3</sub> Cl <sub>4</sub> FIrN <sub>4</sub> | C <sub>29</sub> H <sub>33</sub> Br <sub>3</sub> Cl <sub>6</sub> FN <sub>4</sub> ORh |
| <i>Mr</i>                                                                                        | 1186.15                                                                           | 985.83                                                                            | 1027.93                                                                             |
| crystal system                                                                                   | Triclinic                                                                         | Monoclinic                                                                        | Triclinic                                                                           |
| space group                                                                                      | <i>P</i> -1                                                                       | <i>P</i> <sub>2</sub> /n                                                          | <i>P</i> -1                                                                         |
| <i>a</i> [Å]                                                                                     | 10.636(3)                                                                         | 9.6652(12)                                                                        | 11.8662(13)                                                                         |
| <i>b</i> [Å]                                                                                     | 13.9904(17)                                                                       | 26.138(3)                                                                         | 11.9461(13)                                                                         |
| <i>c</i> [Å]                                                                                     | 15.5229(19)                                                                       | 13.6356(16)                                                                       | 15.5287(17)                                                                         |
| <i>α</i> [°]                                                                                     | 114.736(2)                                                                        | 90                                                                                | 72.454(2)                                                                           |
| <i>β</i> [°]                                                                                     | 100.776(2)                                                                        | 107.956(2)                                                                        | 86.588(2)                                                                           |
| <i>γ</i> [°]                                                                                     | 92.828(2)                                                                         | 90                                                                                | 60.740(2)                                                                           |
| <i>V</i> [Å <sup>3</sup> ]                                                                       | 2039.7(7)                                                                         | 3276.9(7)                                                                         | 1820.8(3)                                                                           |
| <i>T</i> [K]                                                                                     | 193(2)                                                                            | 173(2)                                                                            | 173(2)                                                                              |
| <i>Z</i>                                                                                         | 2                                                                                 | 4                                                                                 | 2                                                                                   |
| $\rho_{\text{calcd}}$ [g cm <sup>-3</sup> ]                                                      | 1.931                                                                             | 1.988                                                                             | 1.875                                                                               |
| $\mu$ [mm <sup>-1</sup> ]                                                                        | 6.768                                                                             | 7.237                                                                             | 4.237                                                                               |
| <i>F</i> (000)                                                                                   | 1140                                                                              | 1882                                                                              | 1008                                                                                |
| independent reflections                                                                          | 0.0284                                                                            | 0.0592                                                                            | 0.0199                                                                              |
| data/restraints/parameters                                                                       | 8558/6/429                                                                        | 7366/0/375                                                                        | 7740/0/411                                                                          |
| <i>R</i> <sub>1</sub> / <i>wR</i> <sub>2</sub> [ <i>I</i> >2 $\sigma$ ( <i>I</i> )] <sup>a</sup> | 0.0496/0.1570                                                                     | 0.0473/0.1039                                                                     | 0.0763/0.2343                                                                       |
| <i>R</i> <sub>1</sub> / <i>wR</i> <sub>2</sub> (all data) <sup>a</sup>                           | 0.0645/0.1902                                                                     | 0.0688/0.1131                                                                     | 0.0960/0.2958                                                                       |
| goodness-of-fit                                                                                  | 1.117                                                                             | 1.106                                                                             | 1.241                                                                               |
| largest residuals [e Å <sup>-3</sup> ]                                                           | 2.749/-2.701                                                                      | 1.616/-1.274                                                                      | 3.013/-3.775                                                                        |

**Table S2.** Crystallographic data and structure refinement parameters for complexes **7Br<sub>2</sub>·4CH<sub>2</sub>Cl<sub>2</sub>**, **8Br<sub>2</sub>·4CH<sub>2</sub>Cl<sub>2</sub>** and **9Br<sub>2</sub>·4CH<sub>2</sub>Cl<sub>2</sub>**.

|                                                                                                  | <b>7Br<sub>2</sub>·4CH<sub>2</sub>Cl<sub>2</sub></b>                                                           | <b>8Br<sub>2</sub>·4CH<sub>2</sub>Cl<sub>2</sub></b>                                                           | <b>9Br<sub>2</sub>·4CH<sub>2</sub>Cl<sub>2</sub></b>                                                |
|--------------------------------------------------------------------------------------------------|----------------------------------------------------------------------------------------------------------------|----------------------------------------------------------------------------------------------------------------|-----------------------------------------------------------------------------------------------------|
| formula                                                                                          | C <sub>58</sub> H <sub>64</sub> Br <sub>4</sub> Cl <sub>20</sub> F <sub>2</sub> Ir <sub>2</sub> N <sub>8</sub> | C <sub>58</sub> H <sub>64</sub> Br <sub>4</sub> Cl <sub>20</sub> F <sub>2</sub> N <sub>8</sub> Rh <sub>2</sub> | C <sub>56</sub> H <sub>60</sub> Br <sub>4</sub> Cl <sub>16</sub> F <sub>2</sub> IrN <sub>8</sub> Rh |
| <i>Mr</i>                                                                                        | 2324.21                                                                                                        | 2145.63                                                                                                        | 2065.07                                                                                             |
| crystal system                                                                                   | Triclinic                                                                                                      | Triclinic                                                                                                      | Triclinic                                                                                           |
| space group                                                                                      | <i>P</i> -1                                                                                                    | <i>P</i> -1                                                                                                    | <i>P</i> -1                                                                                         |
| <i>a</i> [Å]                                                                                     | 11.095(2)                                                                                                      | 11.105(3)                                                                                                      | 11.1069(14)                                                                                         |
| <i>b</i> [Å]                                                                                     | 11.944(3)                                                                                                      | 11.955(3)                                                                                                      | 11.9474(15)                                                                                         |
| <i>c</i> [Å]                                                                                     | 15.850(3)                                                                                                      | 15.826(4)                                                                                                      | 15.827(2)                                                                                           |
| $\alpha$ [°]                                                                                     | 91.503(3)                                                                                                      | 91.337(5)                                                                                                      | 91.503(2)                                                                                           |
| $\beta$ [°]                                                                                      | 100.405(3)                                                                                                     | 100.502(5)                                                                                                     | 100.293(2)                                                                                          |
| $\gamma$ [°]                                                                                     | 100.270(3)                                                                                                     | 100.203(5)                                                                                                     | 100.247(2)                                                                                          |
| V [Å <sup>3</sup> ]                                                                              | 2029.2(7)                                                                                                      | 2029.9(10)                                                                                                     | 2029.8(4)                                                                                           |
| <i>T</i> [K]                                                                                     | 173(2)                                                                                                         | 203(2)                                                                                                         | 173(2)                                                                                              |
| <i>Z</i>                                                                                         | 1                                                                                                              | 1                                                                                                              | 1                                                                                                   |
| $\rho_{\text{calcd}}$ [g cm <sup>-3</sup> ]                                                      | 1.902                                                                                                          | 1.755                                                                                                          | 1.689                                                                                               |
| $\mu$ [mm <sup>-1</sup> ]                                                                        | 5.949                                                                                                          | 3.079                                                                                                          | 4.379                                                                                               |
| <i>F</i> (000)                                                                                   | 1120                                                                                                           | 1056                                                                                                           | 1004                                                                                                |
| independent reflections                                                                          | 0.0553                                                                                                         | 0.0387                                                                                                         | 0.0335                                                                                              |
| data/restraints/parameters                                                                       | 8706/30/402                                                                                                    | 8773/20/402                                                                                                    | 7857/80/402                                                                                         |
| <i>R</i> <sub>1</sub> / <i>wR</i> <sub>2</sub> [ <i>I</i> >2 $\sigma$ ( <i>I</i> )] <sup>a</sup> | 0.0748/0.2262                                                                                                  | 0.0701/0.2087                                                                                                  | 0.0571/0.1710                                                                                       |
| <i>R</i> <sub>1</sub> / <i>wR</i> <sub>2</sub> (all data) <sup>a</sup>                           | 0.1024/0.2732                                                                                                  | 0.1035/0.2586                                                                                                  | 0.0836/0.2118                                                                                       |
| goodness-of-fit                                                                                  | 1.064                                                                                                          | 1.062                                                                                                          | 1.060                                                                                               |
| largest residuals [e Å <sup>-3</sup> ]                                                           | 3.204/-2.851                                                                                                   | 2.347/-1.230                                                                                                   | 1.647/-1.484                                                                                        |

**Table S3.** Crystallographic data and structure refinement parameters for complexes and **11Br<sub>2</sub>**.

| <b>11Br<sub>2</sub></b>                                                                  |                                                                                                                               |
|------------------------------------------------------------------------------------------|-------------------------------------------------------------------------------------------------------------------------------|
| formula                                                                                  | C <sub>53</sub> H <sub>60</sub> Br <sub>6</sub> Cl <sub>10</sub> F <sub>2</sub> Ir <sub>2</sub> N <sub>8</sub> O <sub>3</sub> |
| <i>Mr</i>                                                                                | 2113.45                                                                                                                       |
| crystal system                                                                           | Monoclinic                                                                                                                    |
| space group                                                                              | <i>P</i> 2 <sub>1</sub> / <i>n</i>                                                                                            |
| <i>a</i> [Å]                                                                             | 18.5068(16)                                                                                                                   |
| <i>b</i> [Å]                                                                             | 14.4057(13)                                                                                                                   |
| <i>c</i> [Å]                                                                             | 27.924(3)                                                                                                                     |
| <i>α</i> [°]                                                                             | 90                                                                                                                            |
| <i>β</i> [°]                                                                             | 91.462(2)                                                                                                                     |
| <i>γ</i> [°]                                                                             | 90                                                                                                                            |
| <i>V</i> [Å <sup>3</sup> ]                                                               | 7442.3(11)                                                                                                                    |
| <i>T</i> [K]                                                                             | 296(2)                                                                                                                        |
| <i>Z</i>                                                                                 | 4                                                                                                                             |
| $\rho_{\text{calcd}}$ [g cm <sup>-3</sup> ]                                              | 1.886                                                                                                                         |
| $\mu$ [mm <sup>-1</sup> ]                                                                | 7.201                                                                                                                         |
| <i>F</i> (000)                                                                           | 4040                                                                                                                          |
| independent reflections                                                                  | 0.0655                                                                                                                        |
| data/restraints/parameters                                                               | 16423/103/732                                                                                                                 |
| <i>R</i> <sub>1</sub> / <i>wR</i> <sub>2</sub> [ <i>I</i> > 2σ( <i>I</i> )] <sup>a</sup> | 0.0450/0.1150                                                                                                                 |
| <i>R</i> <sub>1</sub> / <i>wR</i> <sub>2</sub> (all data) <sup>a</sup>                   | 0.1013/0.1411                                                                                                                 |
| goodness-of-fit                                                                          | 0.984                                                                                                                         |
| largest residuals [e Å <sup>-3</sup> ]                                                   | 1.434/-1.005                                                                                                                  |

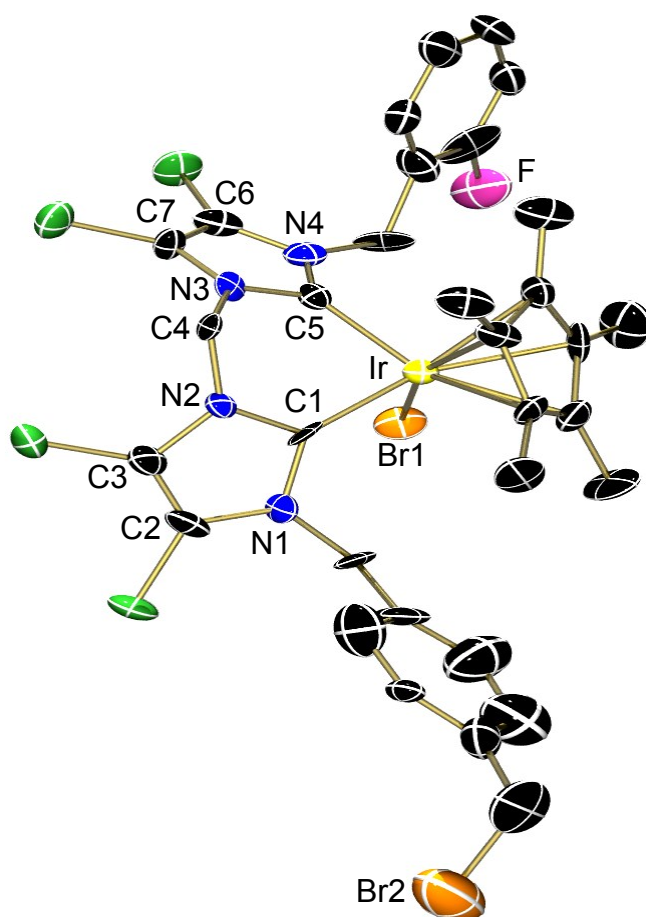

**Figure S1.** Molecular structure of complex cation  $6^+$ . While the structure is not publishable due to the low quality of the acquired data, this figure allows the reader to get an idea of the spatial distribution of the atoms.

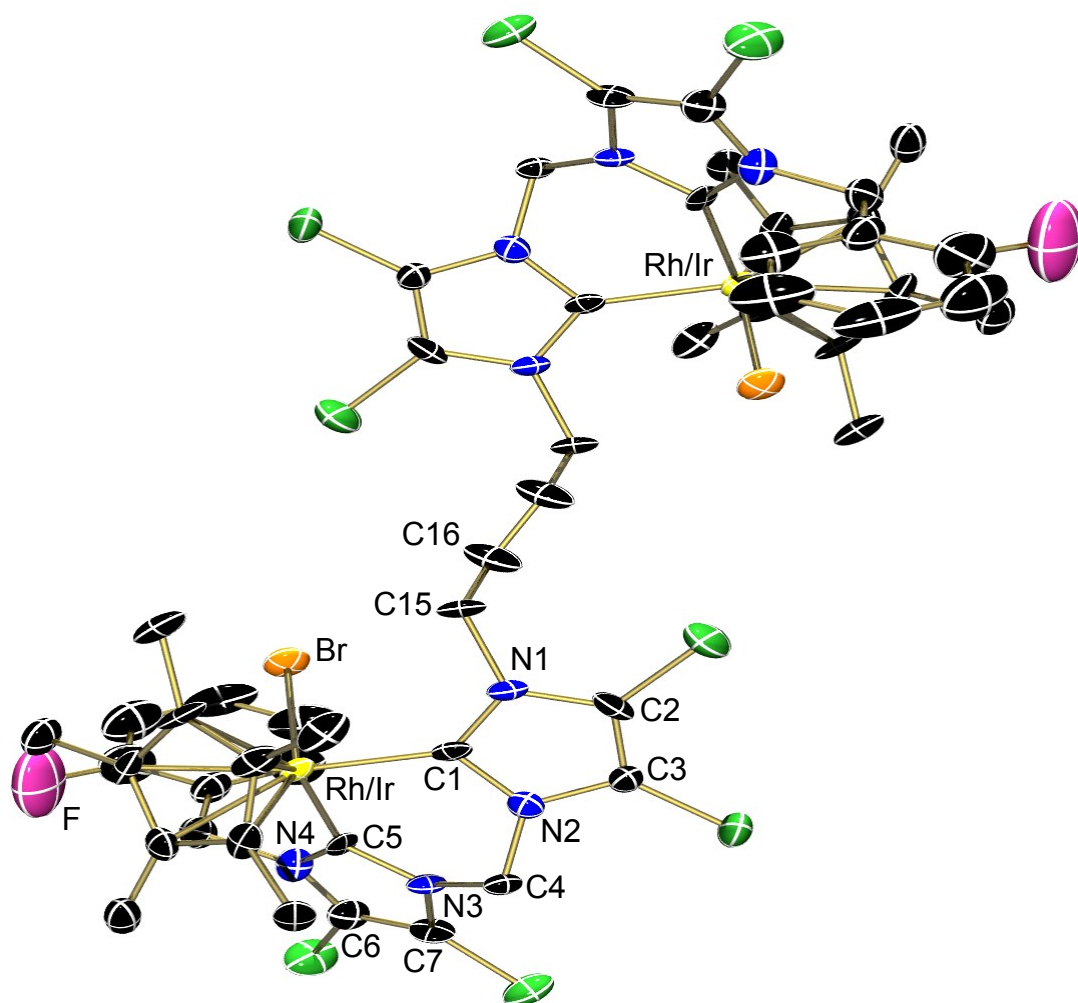

**Figure S2.** Molecular structure of complex cation  $9^{2+}$  in  $9\text{Br}_2 \cdot 4\text{CH}_2\text{Cl}_2$ . Displacement ellipsoids are drawn at the 50% probability level (all hydrogen atoms have been omitted for clarity). Selected bond lengths (Å) and angles (deg): Ir/Rh–C1 2.021(9), Ir/Rh–C5 2.056(9), N1–C1 1.330(11), N2–C1 1.349(11), N3–C5 1.312(10), N4–C5 1.343(11); Br–Ir/Rh–C1 91.6(2), Br–Ir/Rh–C5 90.7(2), C1–Ir/Rh–C5 85.3(3), N1–C1–N2 102.5(7), N3–C5–N4 105.7(8).

### 3. NMR Spectra

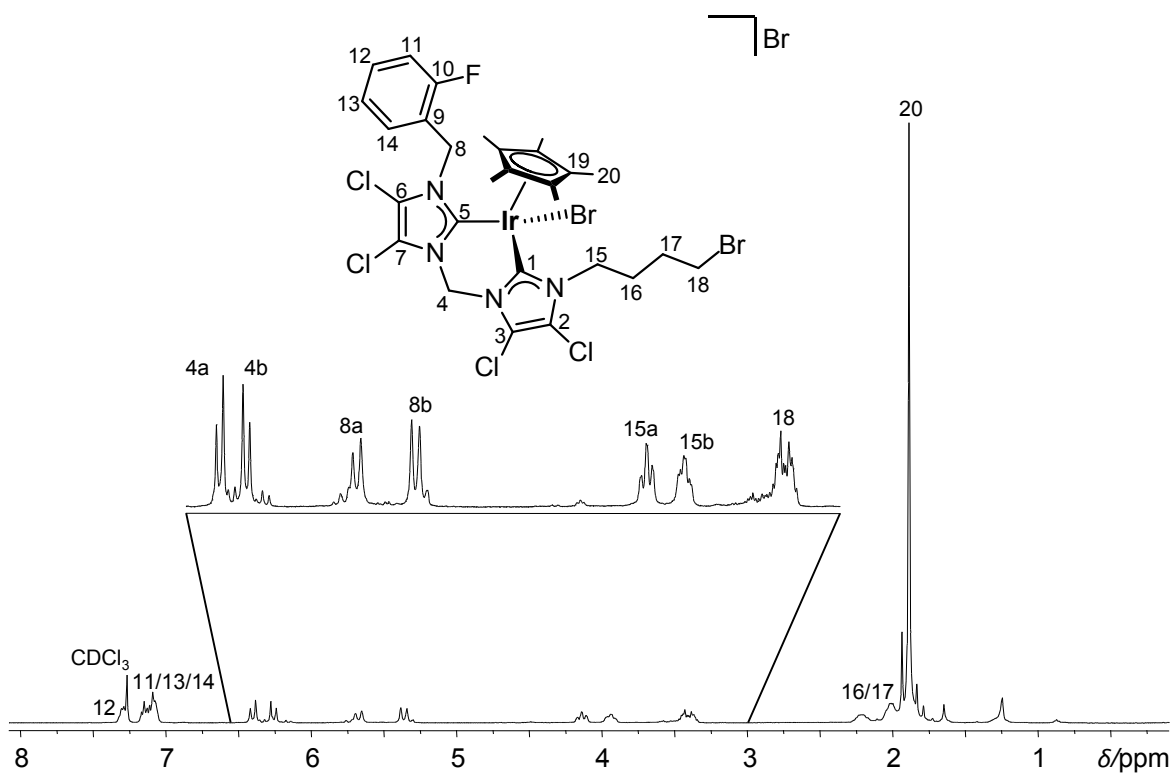

**Figure S3.**  $^1\text{H}$  NMR spectrum of complex **3Br** in  $\text{CDCl}_3$ .

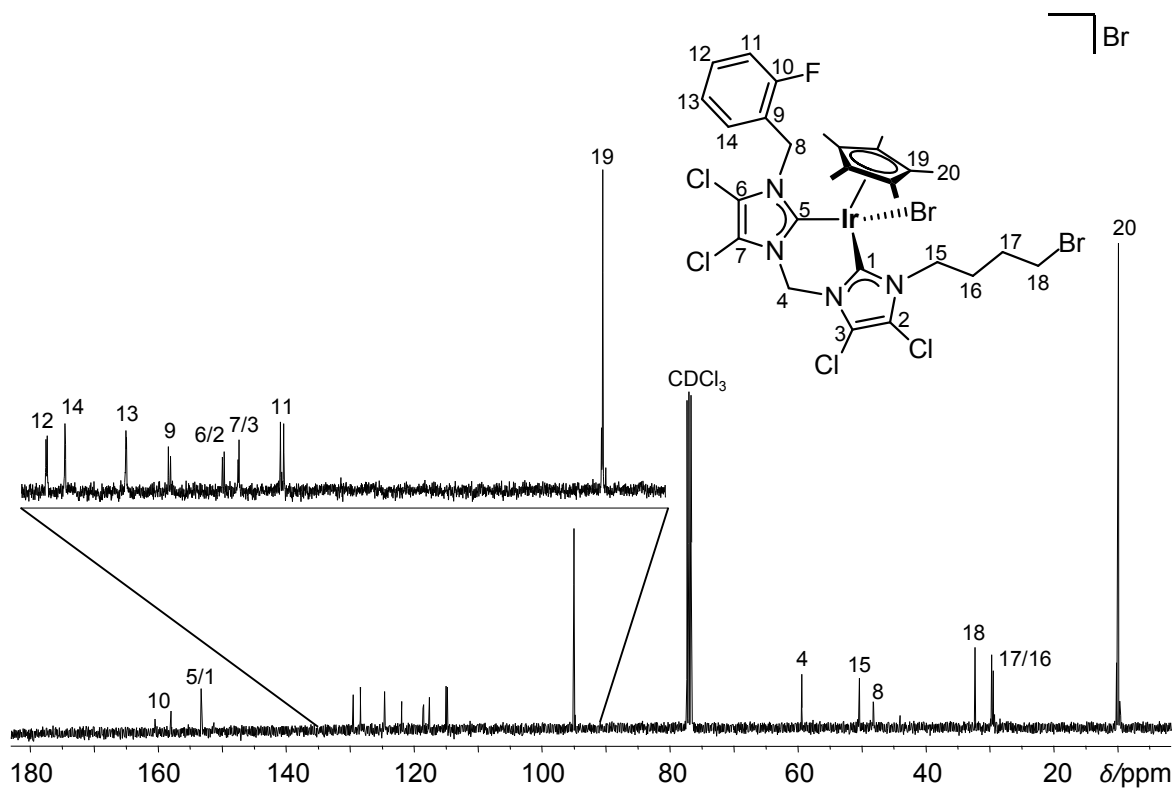

**Figure S4.**  $^{13}\text{C}\{^1\text{H}\}$  NMR spectrum of complex **3Br** in  $\text{CDCl}_3$ .



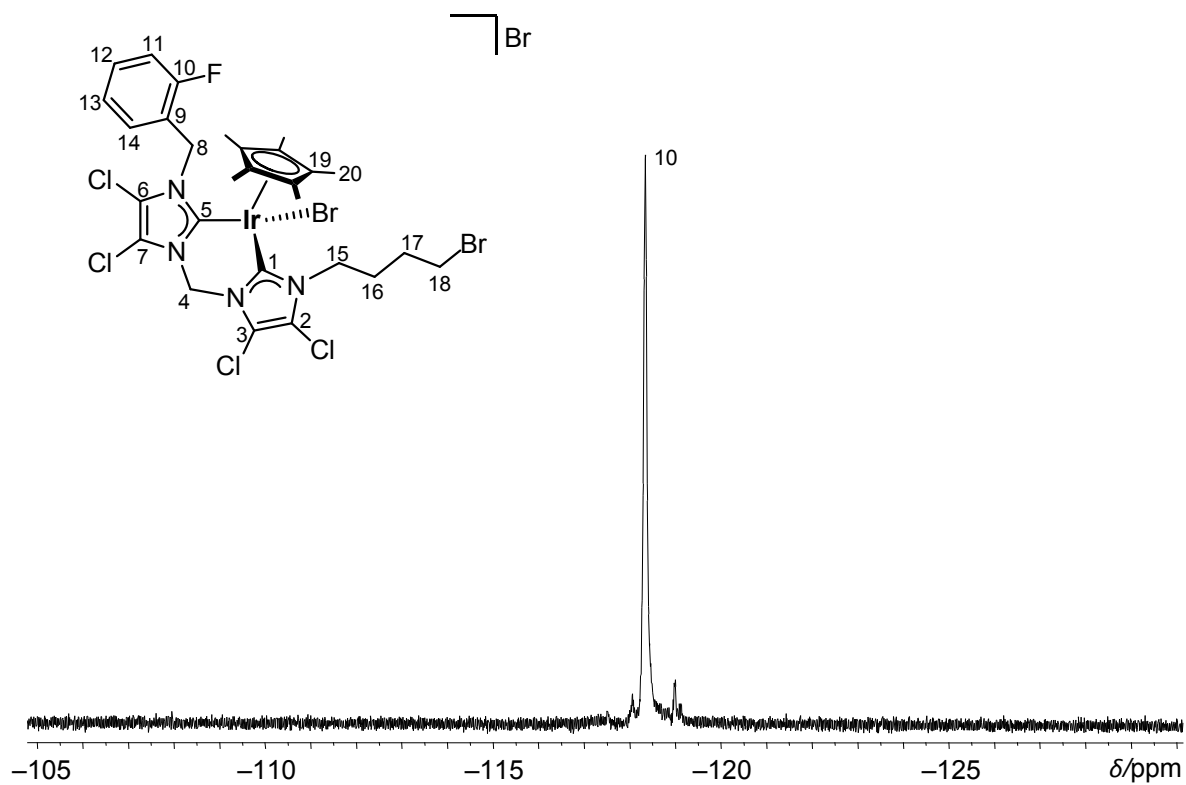

**Figure S5.**  $^{19}\text{F} \{^1\text{H}\}$  NMR spectrum of complex **3Br** in  $\text{CDCl}_3$ .

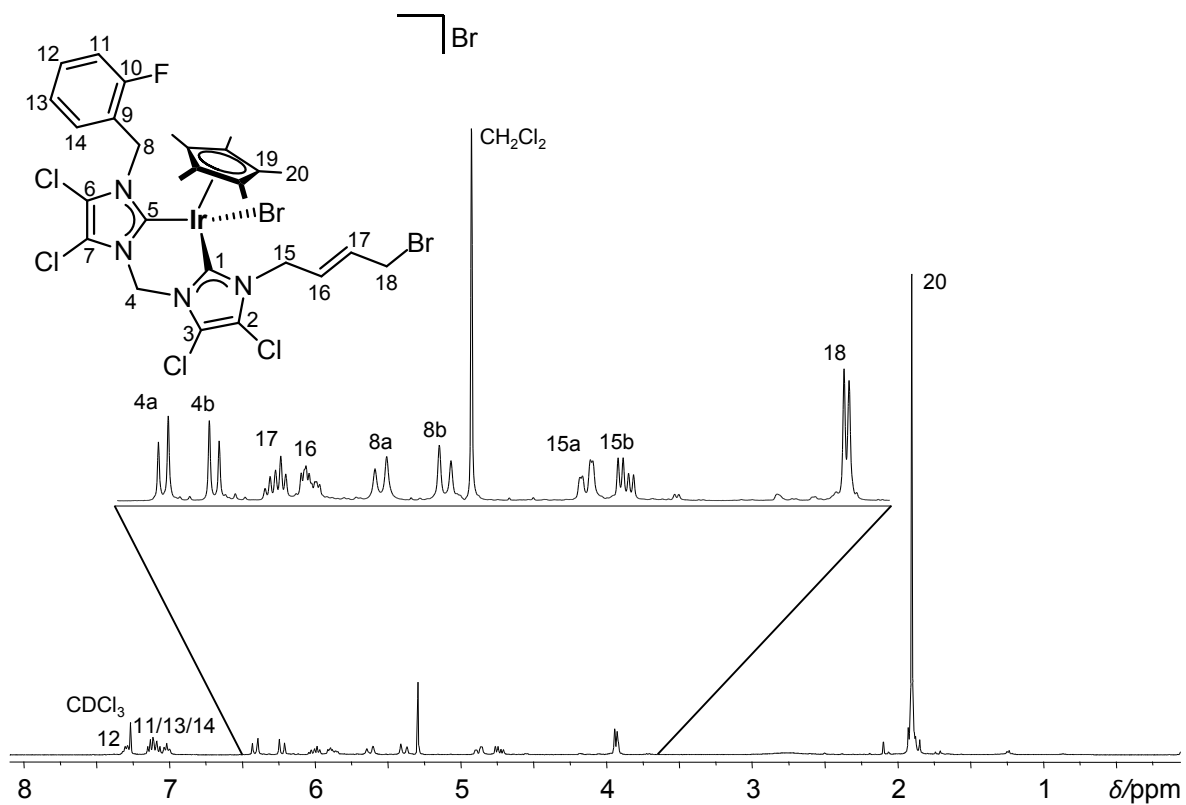

**Figure S6.**  $^1\text{H}$  NMR spectrum of complex **4Br** in  $\text{CDCl}_3$ .

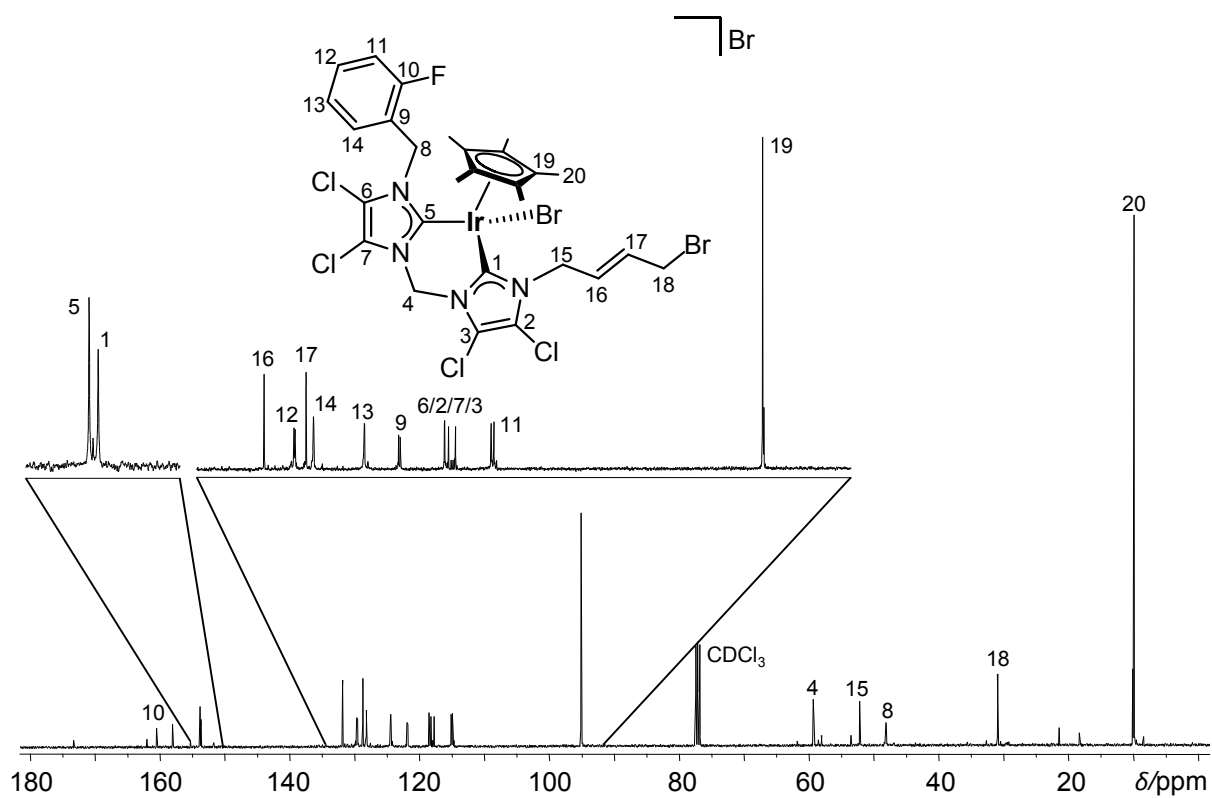

**Figure S7.**  $^{13}\text{C}\{^1\text{H}\}$  NMR spectrum of complex **4Br** in  $\text{CDCl}_3$ .

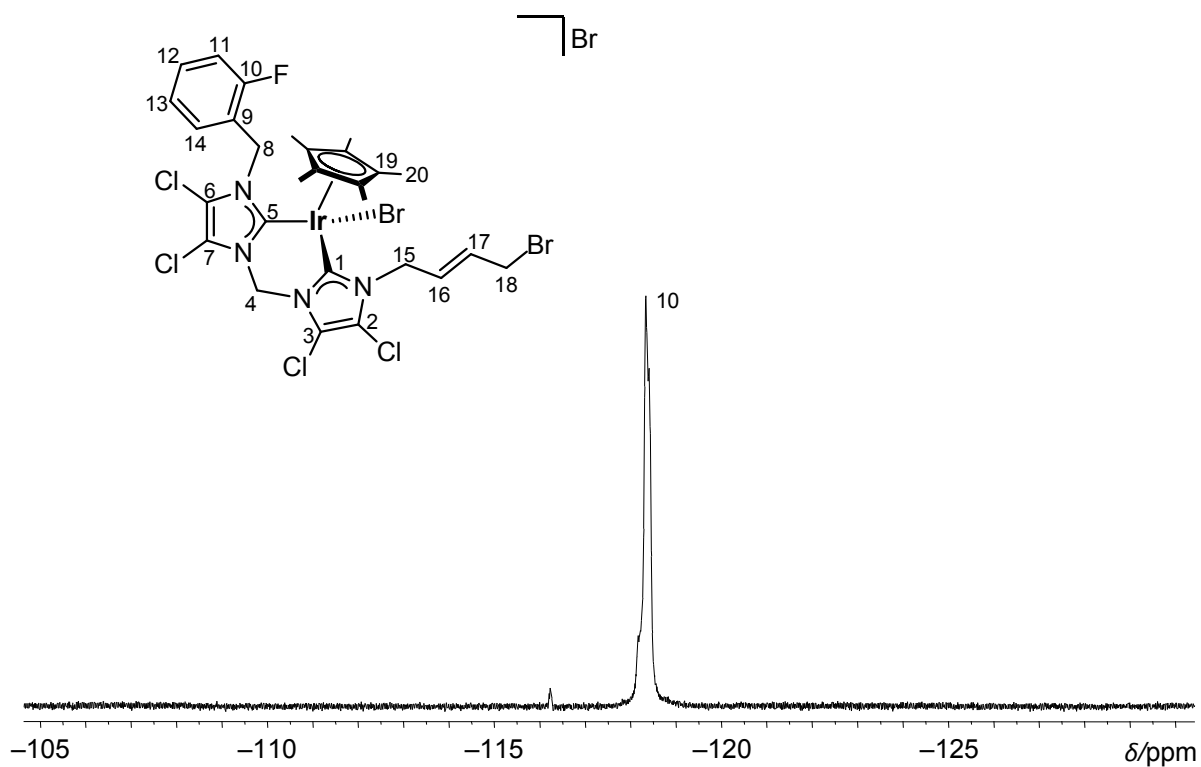

**Figure S8.**  $^{19}\text{F}\{^1\text{H}\}$  NMR spectrum of complex **4Br** in  $\text{CDCl}_3$ .

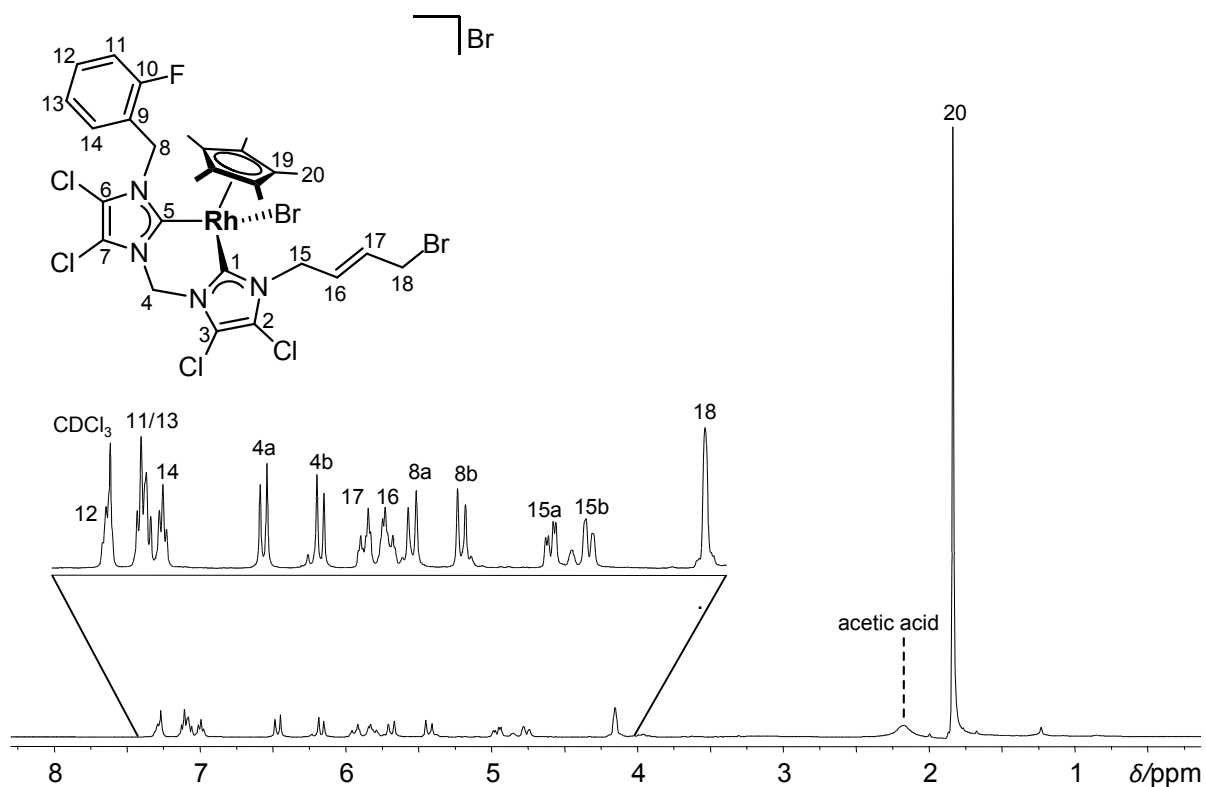

**Figure S9.**  $^1\text{H}$  NMR spectrum of complex **5Br** in  $\text{CDCl}_3$ .

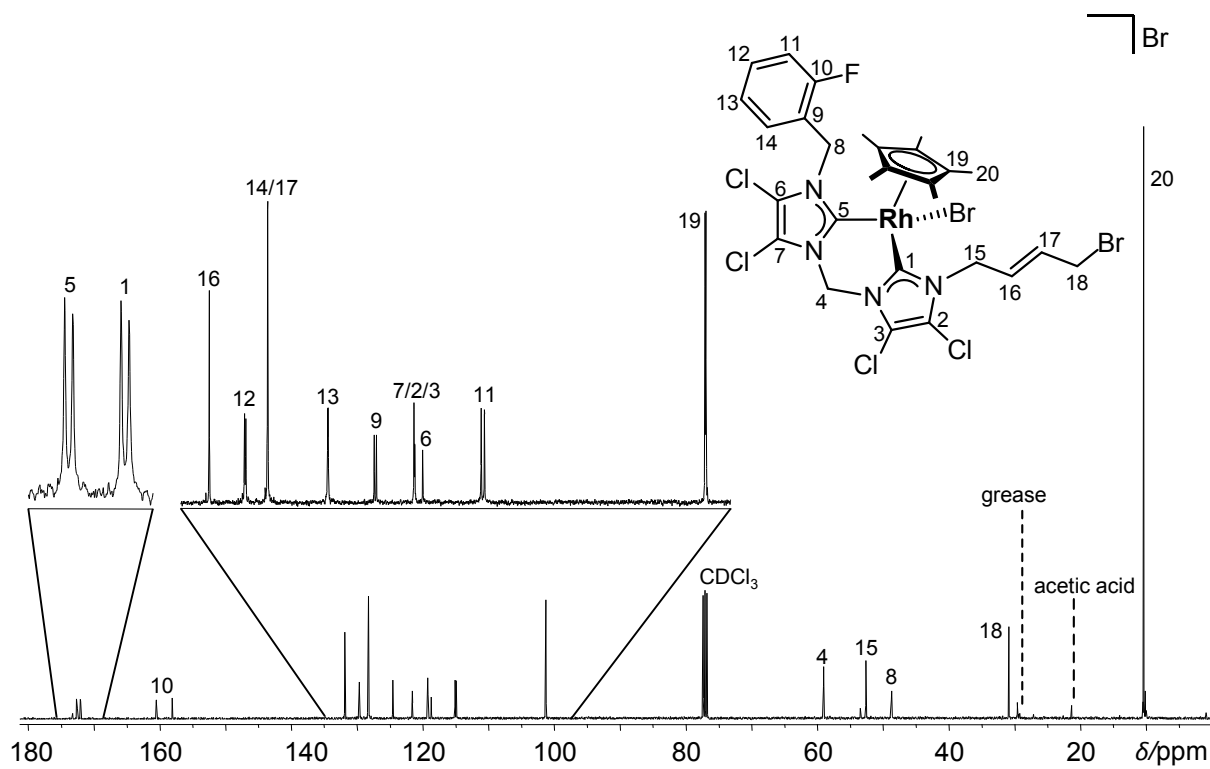

**Figure S10.**  $^{13}\text{C}\{^1\text{H}\}$  NMR spectrum of complex **5Br** in  $\text{CDCl}_3$ .

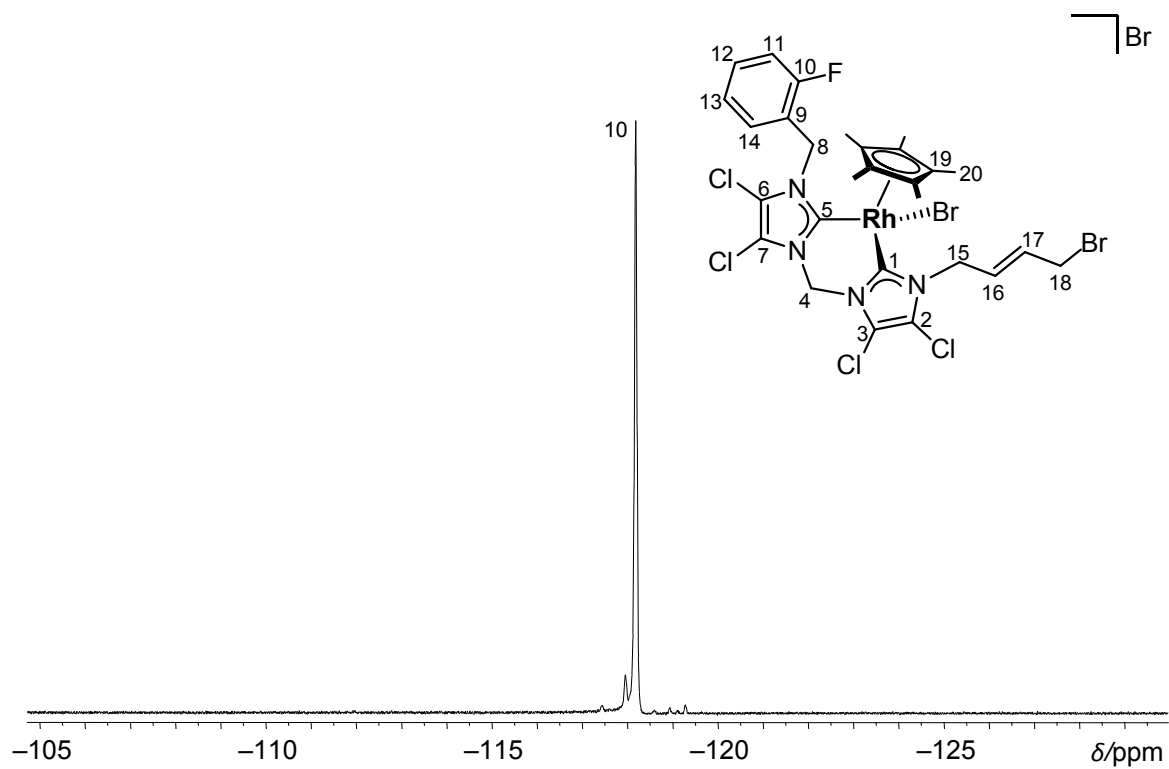

**Figure S11.**  $^{19}\text{F}\{^1\text{H}\}$  NMR spectrum of complex **5Br** in  $\text{CDCl}_3$ .

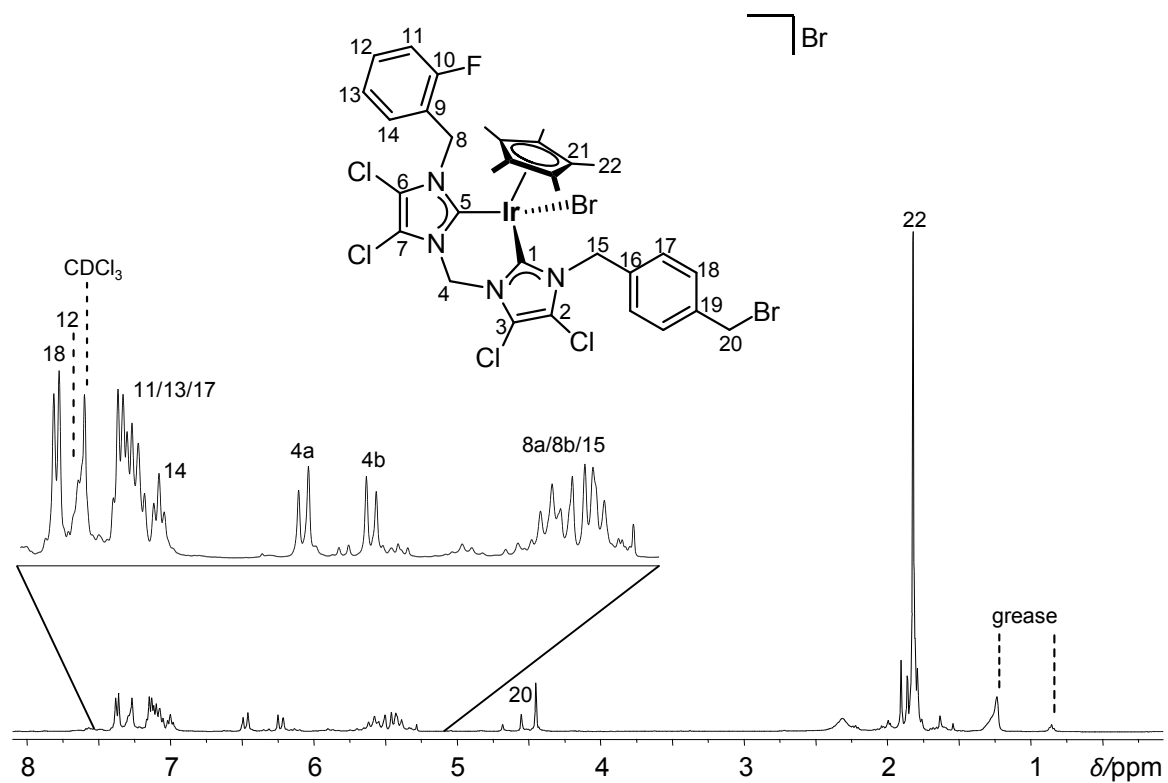

**Figure S12.**  $^1\text{H}$  NMR spectrum of complex **6Br** in  $\text{CDCl}_3$ .

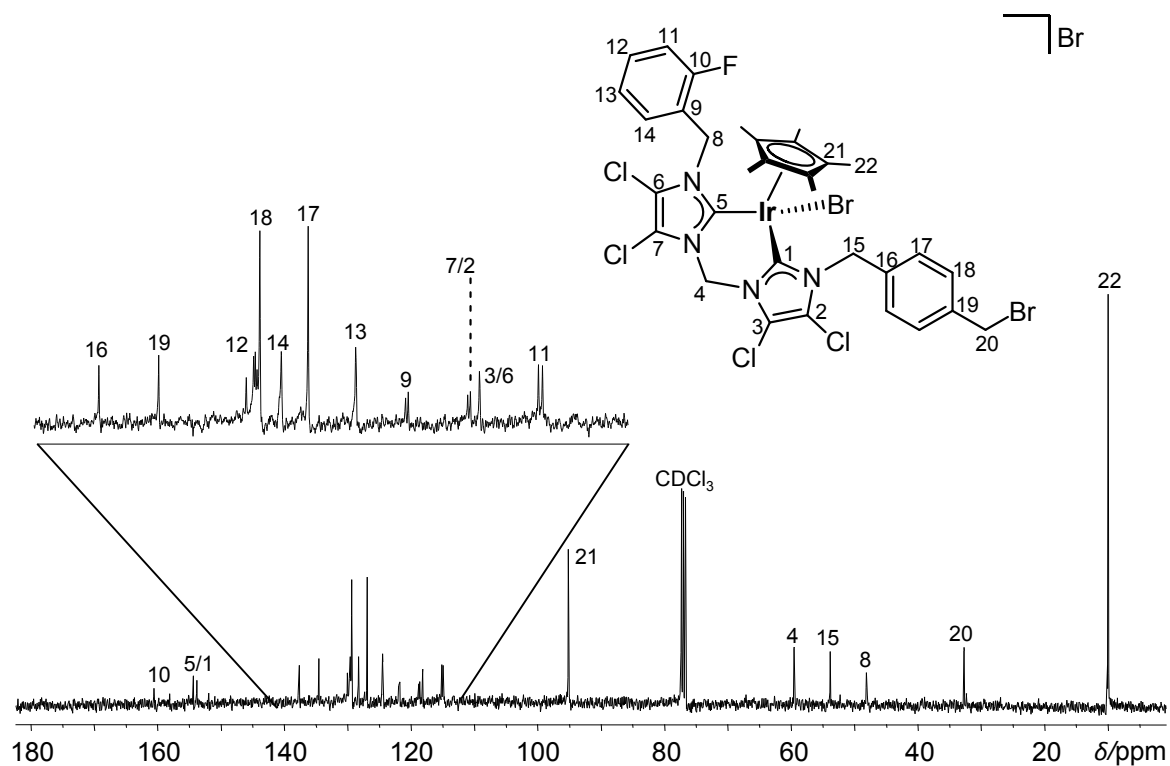

**Figure S13.**  $^{13}\text{C}\{^1\text{H}\}$  NMR spectrum of complex **6Br** in  $\text{CDCl}_3$ .

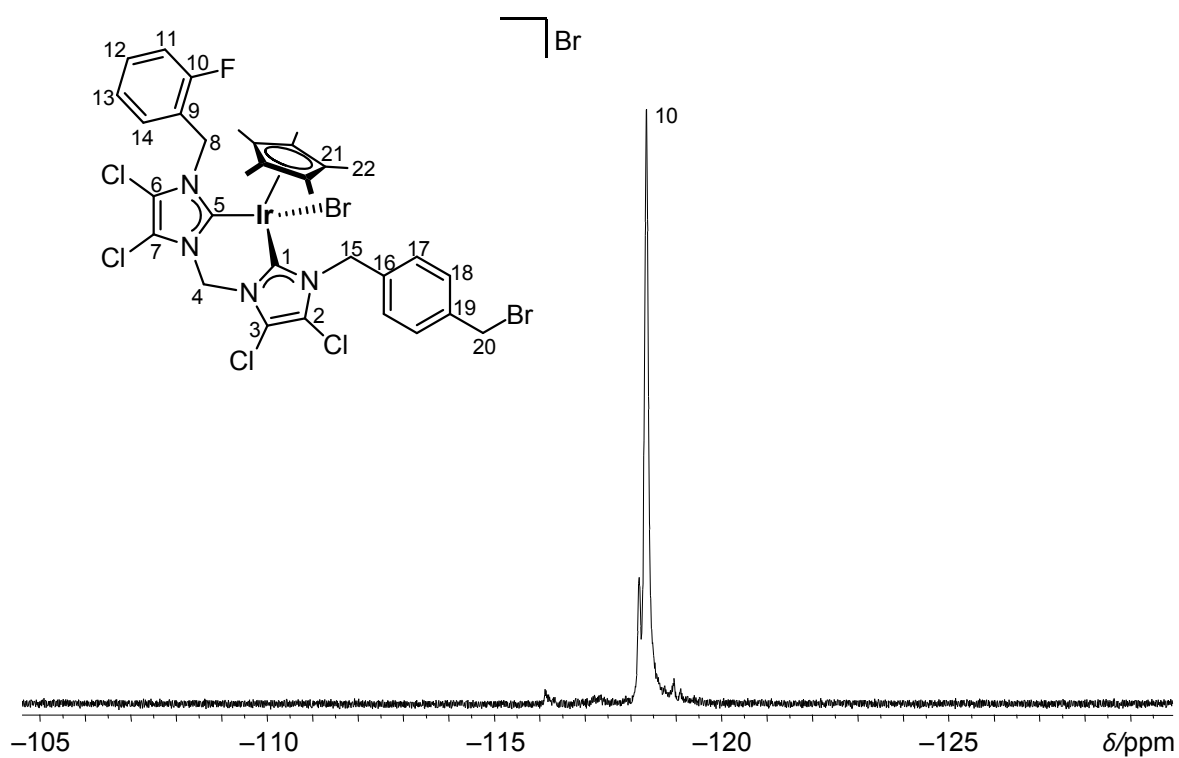

**Figure S14.**  $^{19}\text{F}\{^1\text{H}\}$  NMR spectrum of complex **6Br** in  $\text{CDCl}_3$ .

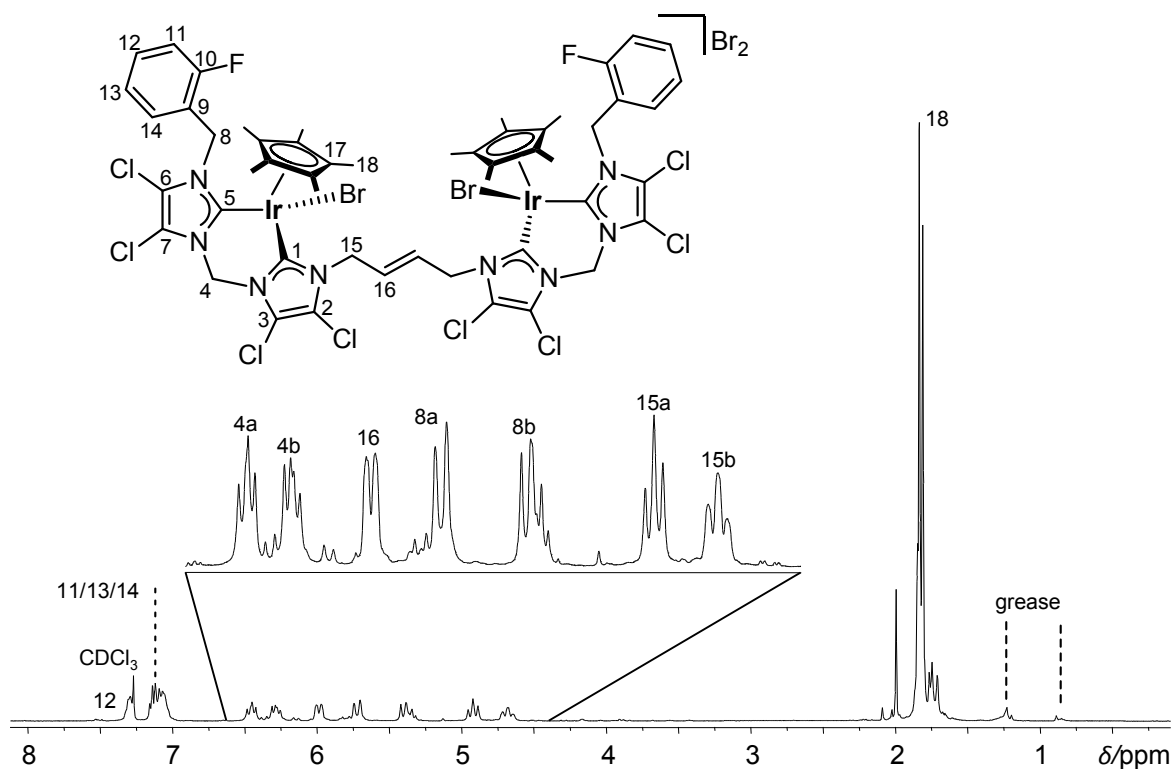

**Figure S15.**  $^1\text{H}$  NMR spectrum of complex  $7\text{Br}_2$  in  $\text{CDCl}_3$ .

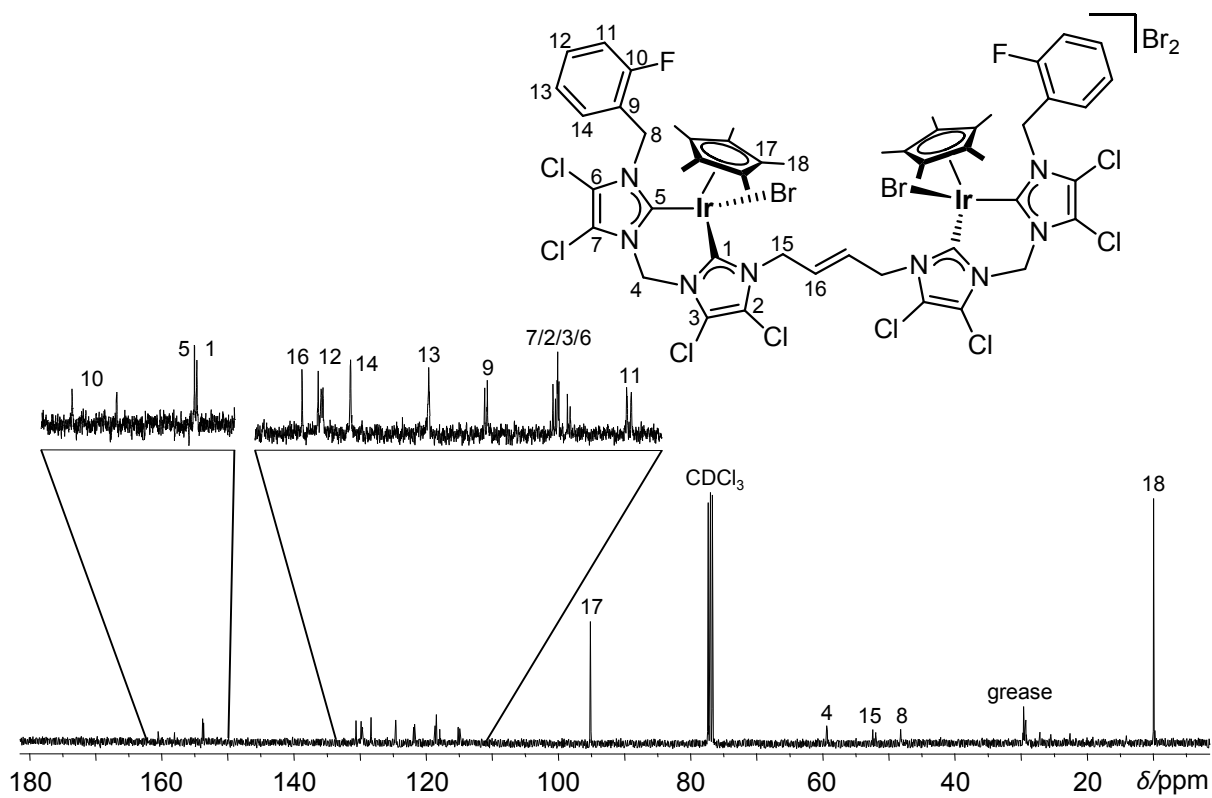

**Figure S16.**  $^{13}\text{C}\{^1\text{H}\}$  NMR spectrum of complex  $7\text{Br}_2$  in  $\text{CDCl}_3$ .

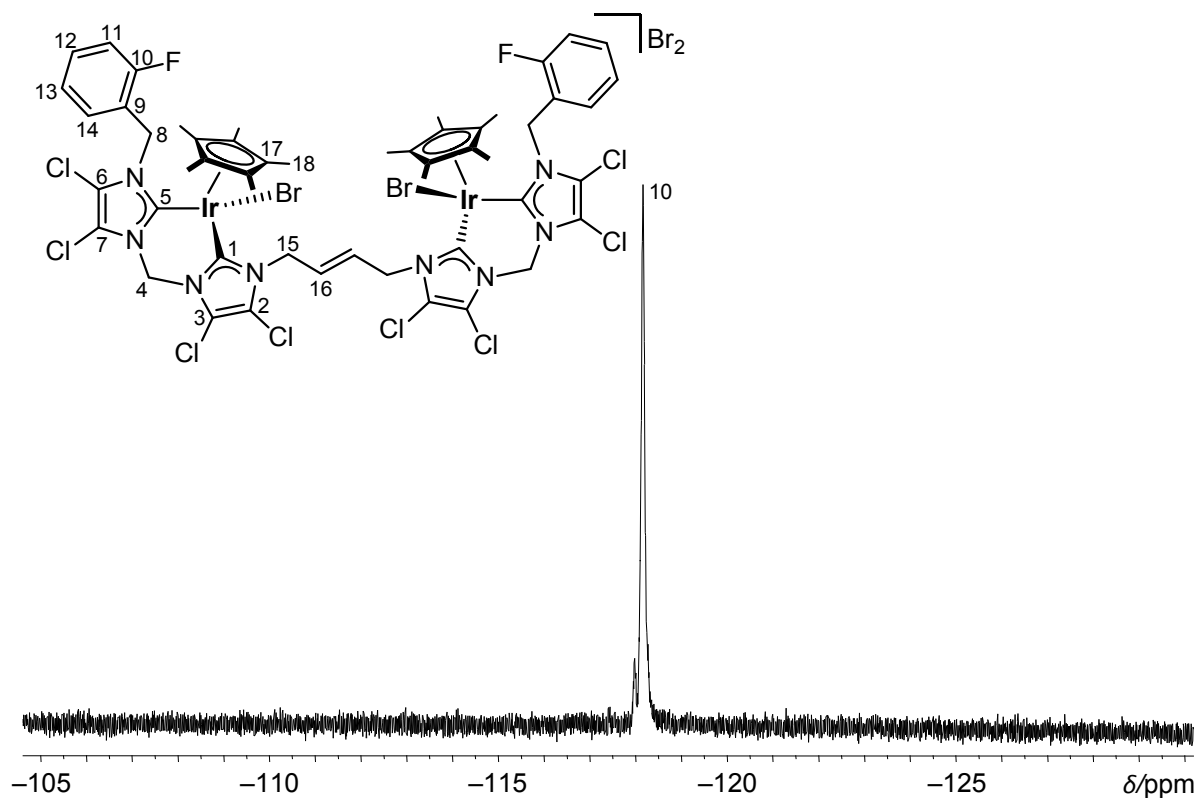

**Figure S17.**  $^{19}\text{F}\{^1\text{H}\}$  NMR spectrum of complex  $7\text{Br}_2$  in  $\text{CDCl}_3$ .

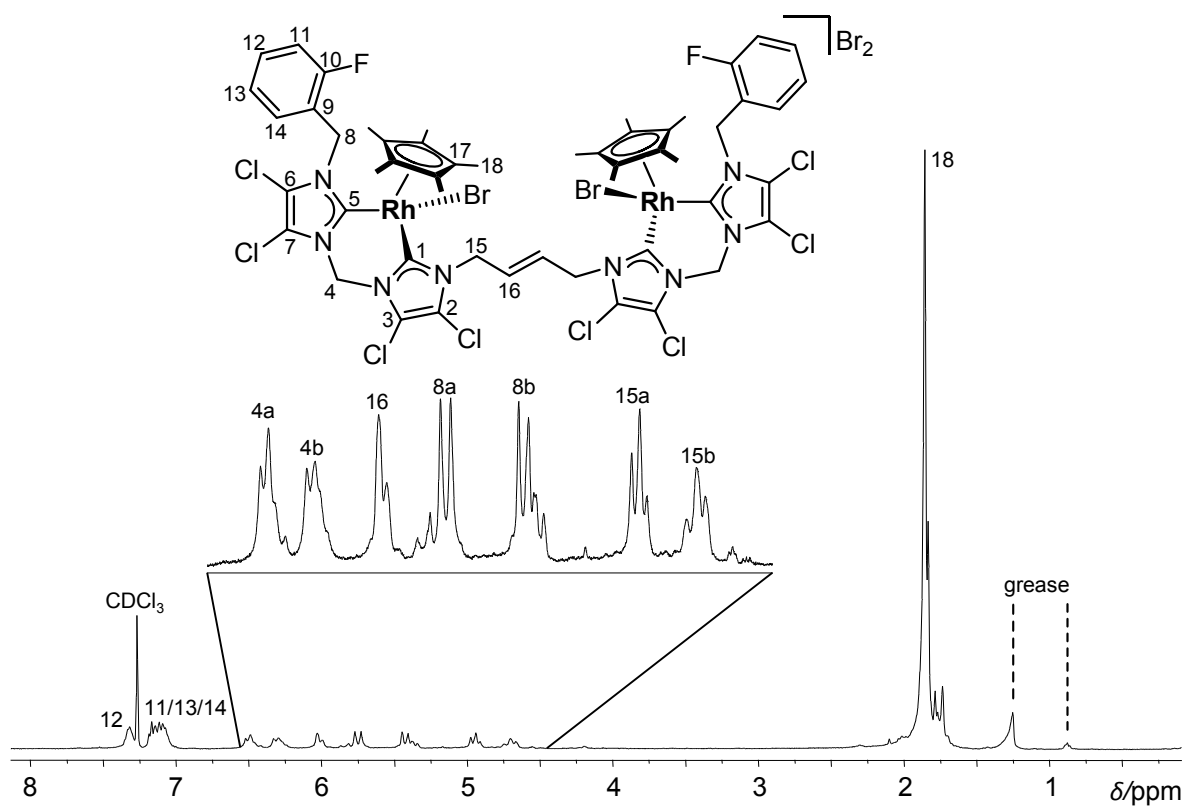

**Figure S18.**  $^1\text{H}$  NMR spectrum of complex  $8\text{Br}_2$  in  $\text{CDCl}_3$ .

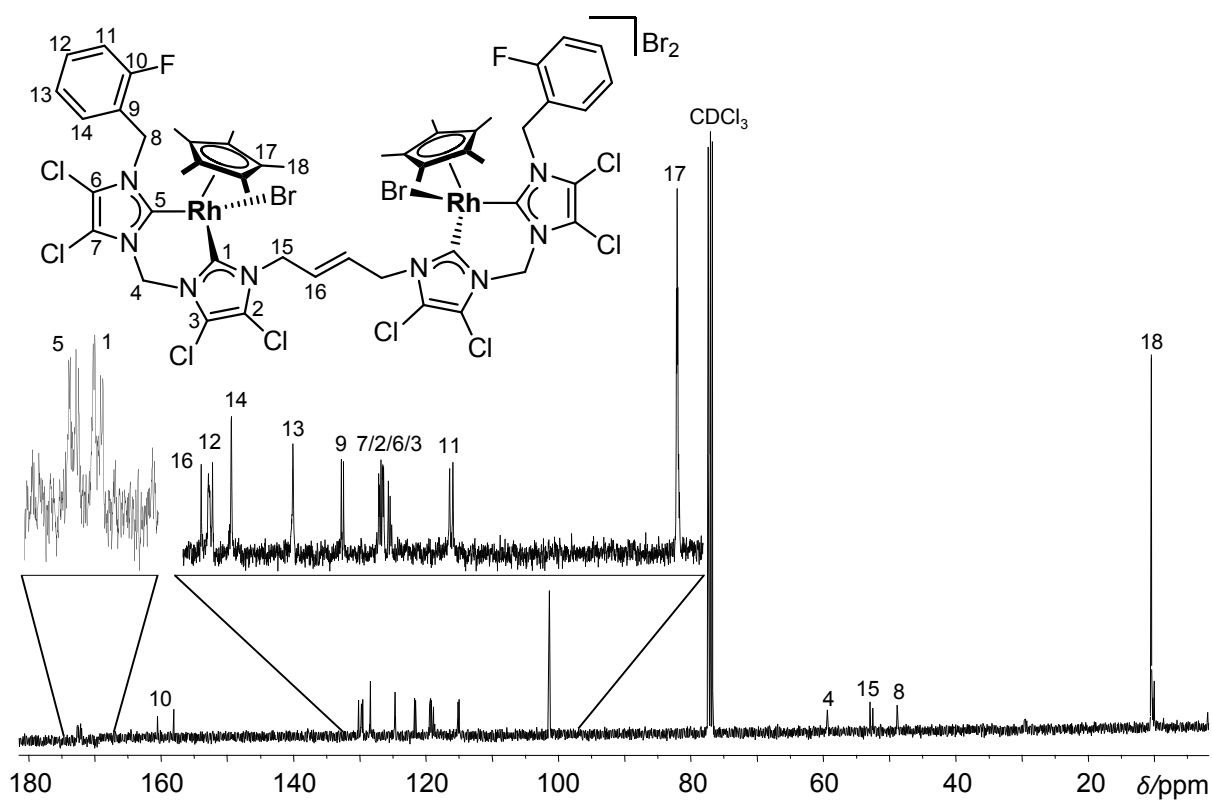

**Figure S19.**  $^{13}\text{C}\{^1\text{H}\}$  NMR spectrum of complex  $\mathbf{8Br}_2$  in  $\text{CDCl}_3$ .

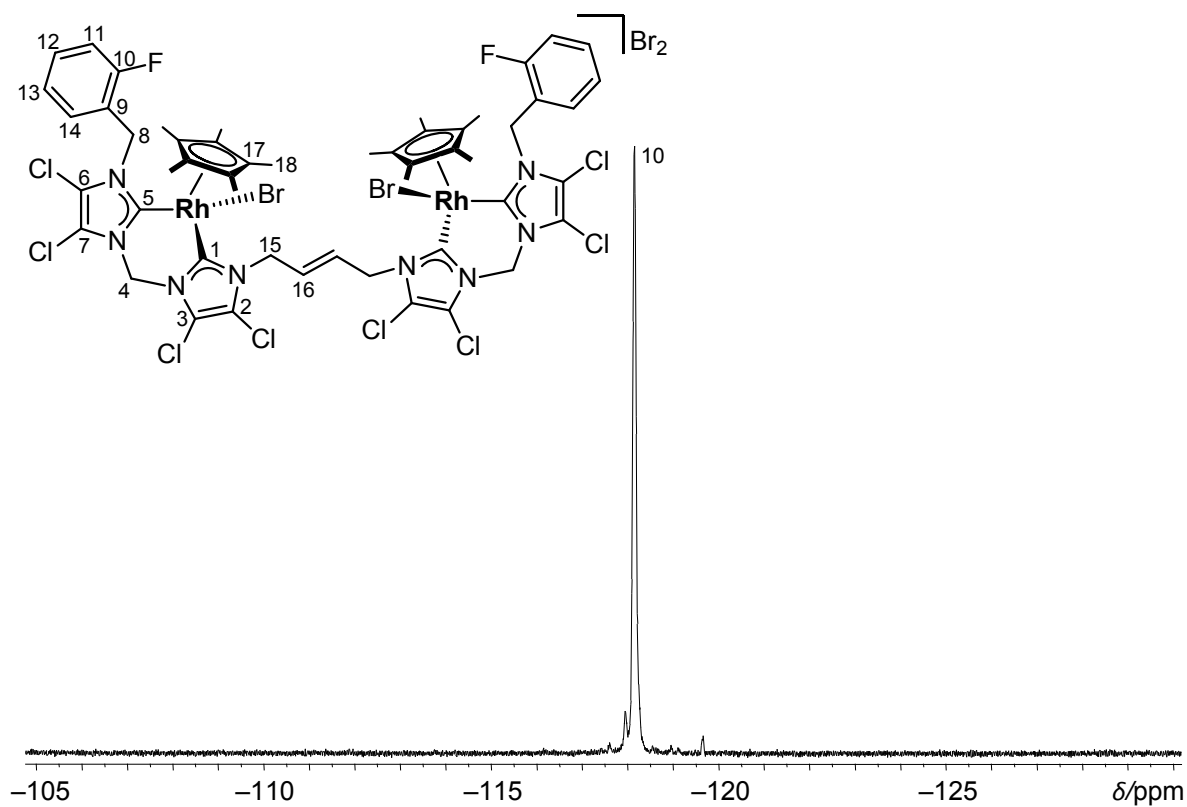

**Figure. S20.**  $^{19}\text{F}\{^1\text{H}\}$  NMR spectrum of complex  $\mathbf{8Br}_2$  in  $\text{CDCl}_3$ .



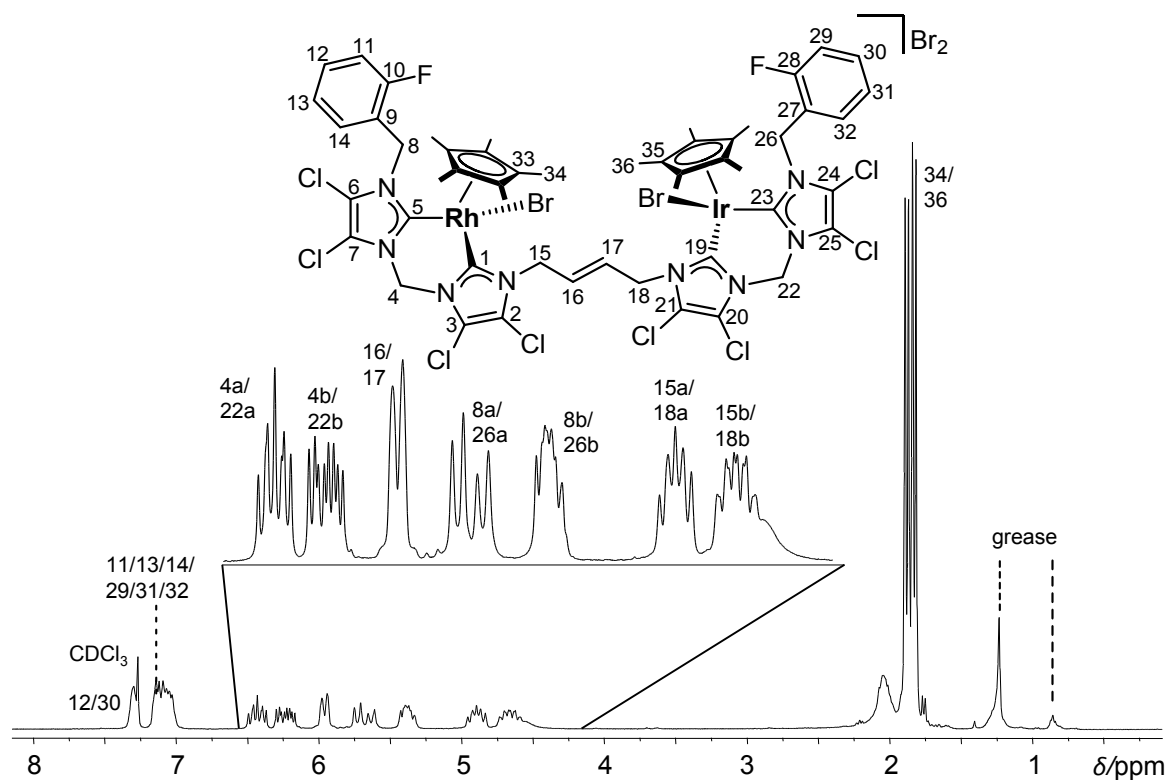

**Figure S21.**  $^1\text{H}$  NMR spectrum of complex  $9\text{Br}_2$  in  $\text{CDCl}_3$ .

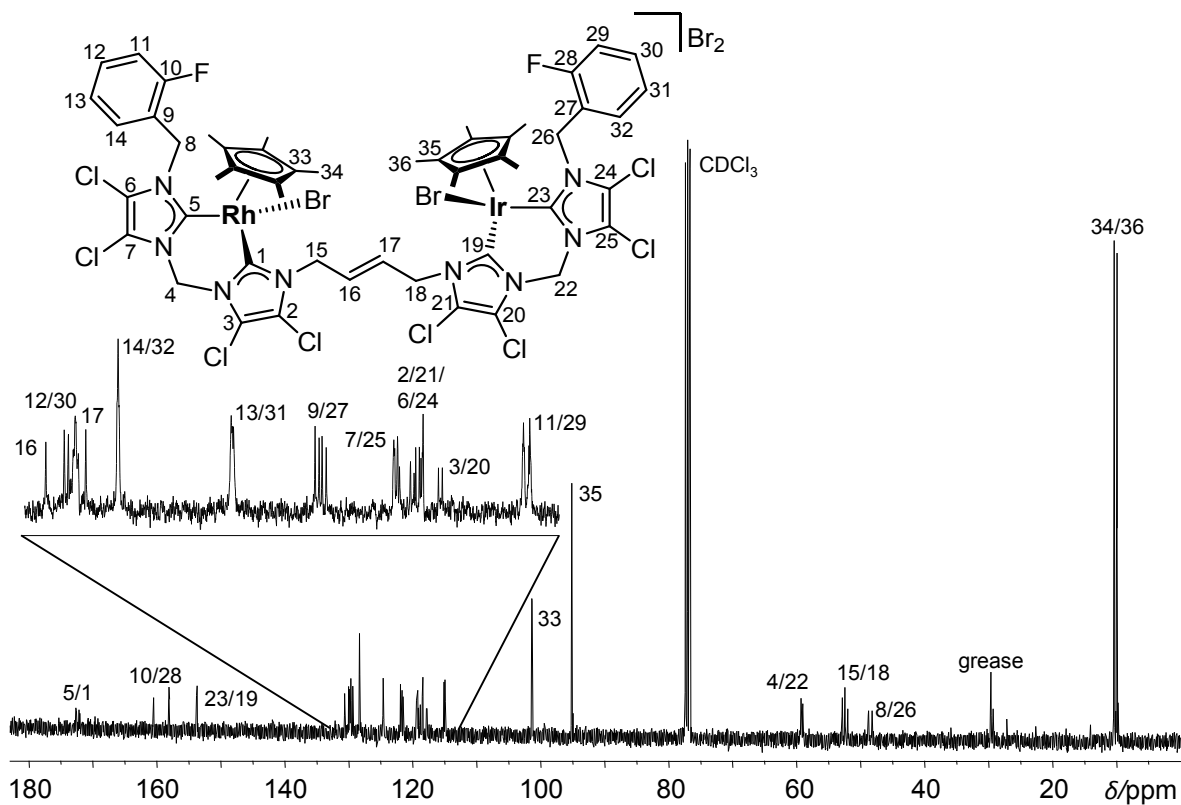

**Figure S22.**  $^{13}\text{C}\{^1\text{H}\}$  NMR spectrum of complex  $9\text{Br}_2$  in  $\text{CDCl}_3$ .

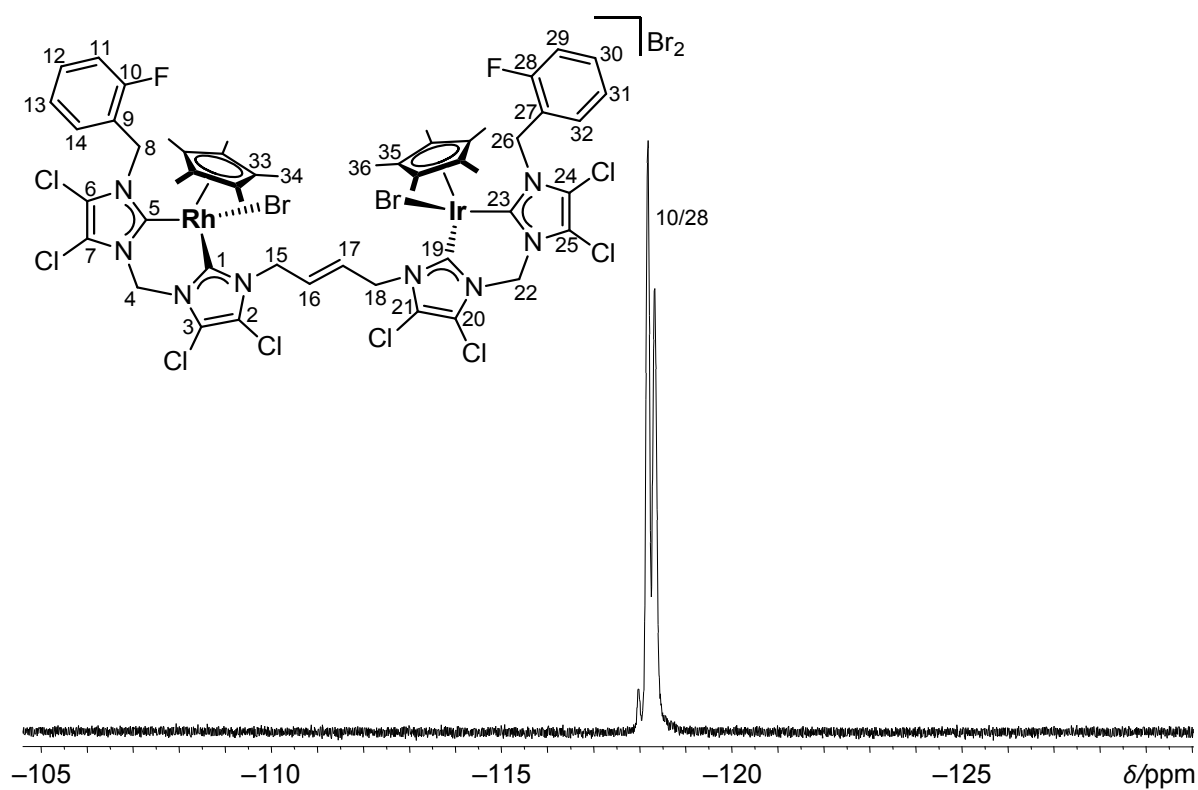

**Figure S23.**  $^{19}\text{F}\{^1\text{H}\}$  NMR spectrum of complex  $9\text{Br}_2$  in  $\text{CDCl}_3$ .

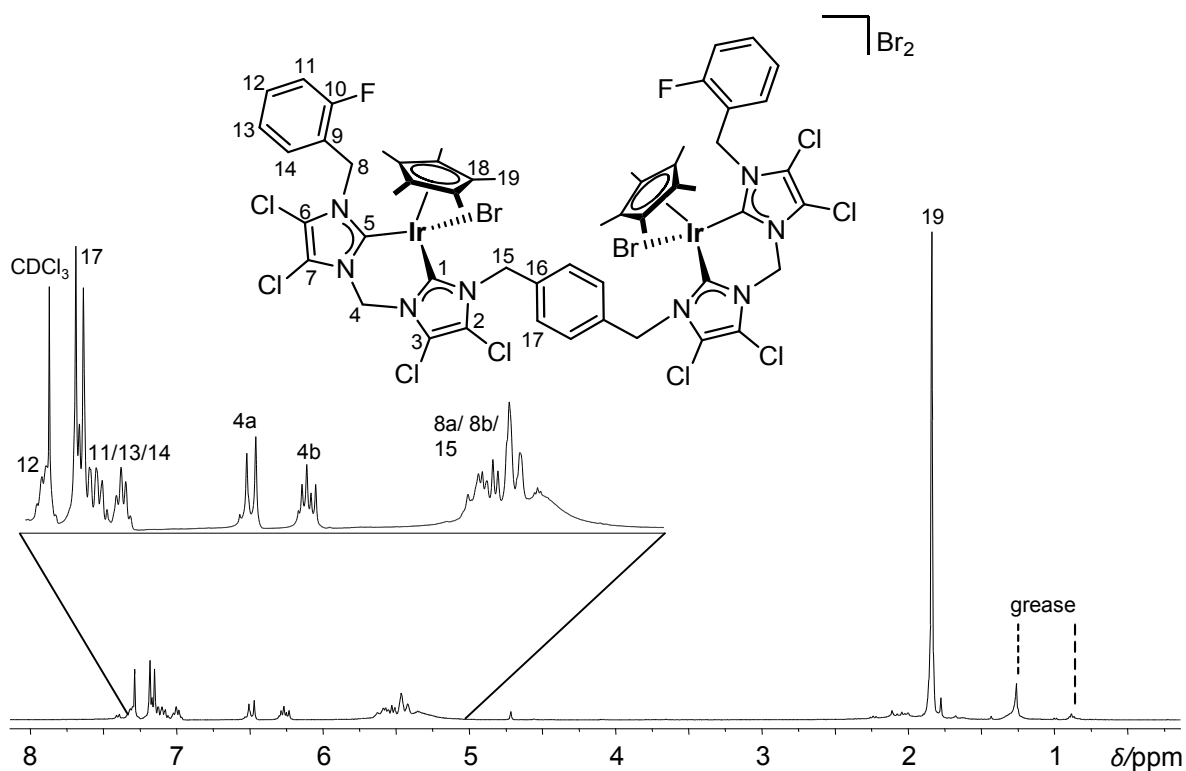

**Figure S24.**  $^1\text{H}$  NMR spectrum of complex  $10\text{Br}_2$  in  $\text{CDCl}_3$ .

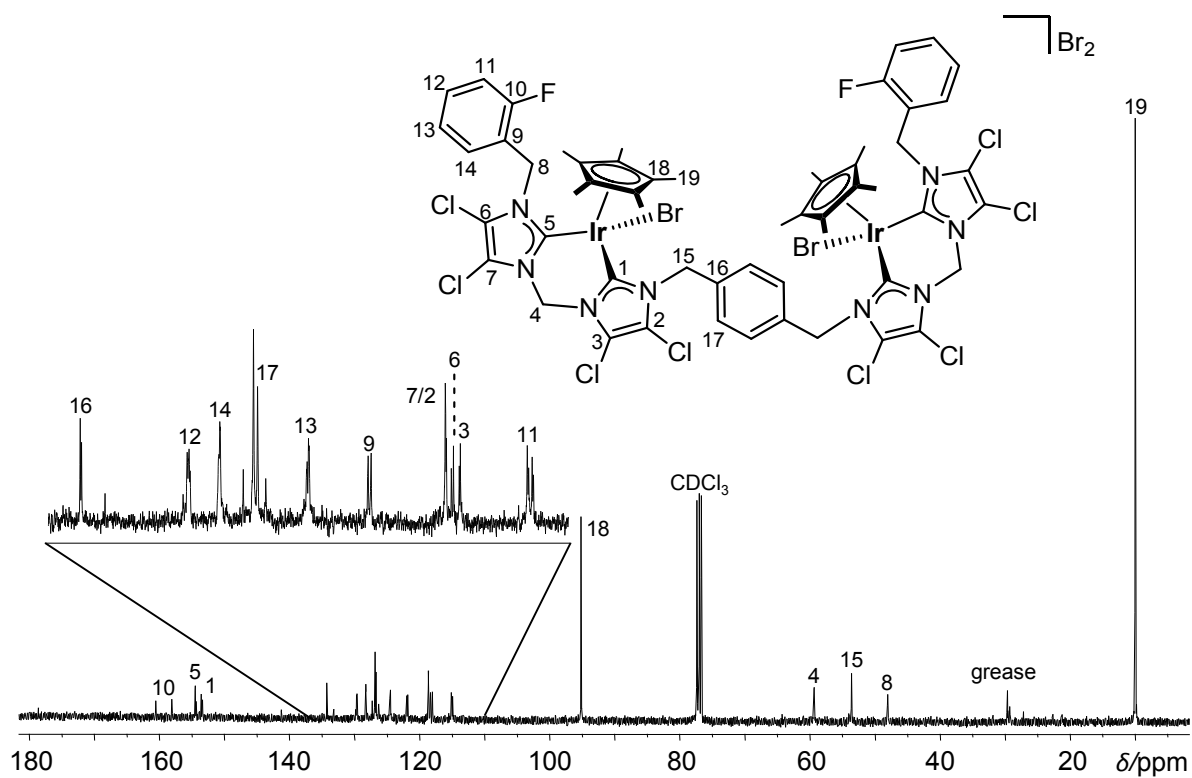

**Figure S25.**  $^{13}\text{C}\{^1\text{H}\}$  NMR spectrum of complex  $10\text{Br}_2$  in  $\text{CDCl}_3$ .

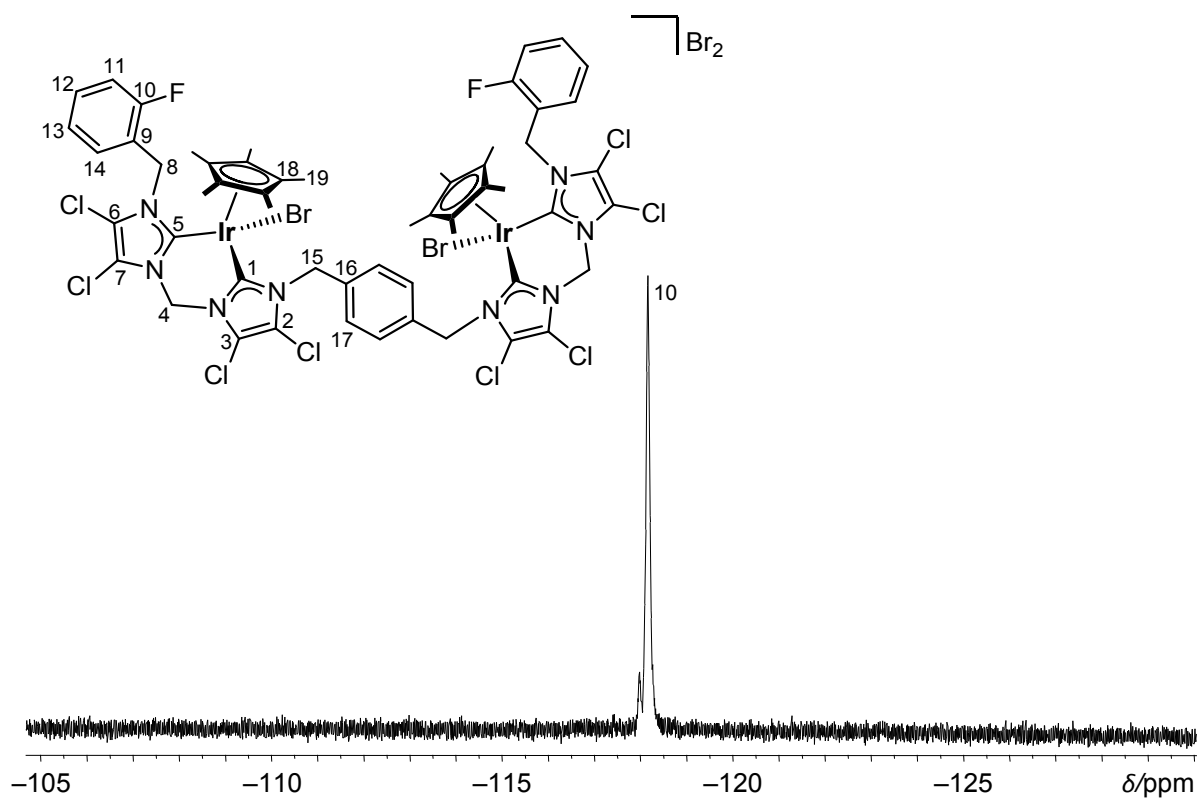

**Figure S26.**  $^{19}\text{F}\{^1\text{H}\}$  NMR spectrum of complex  $10\text{Br}_2$  in  $\text{CDCl}_3$ .

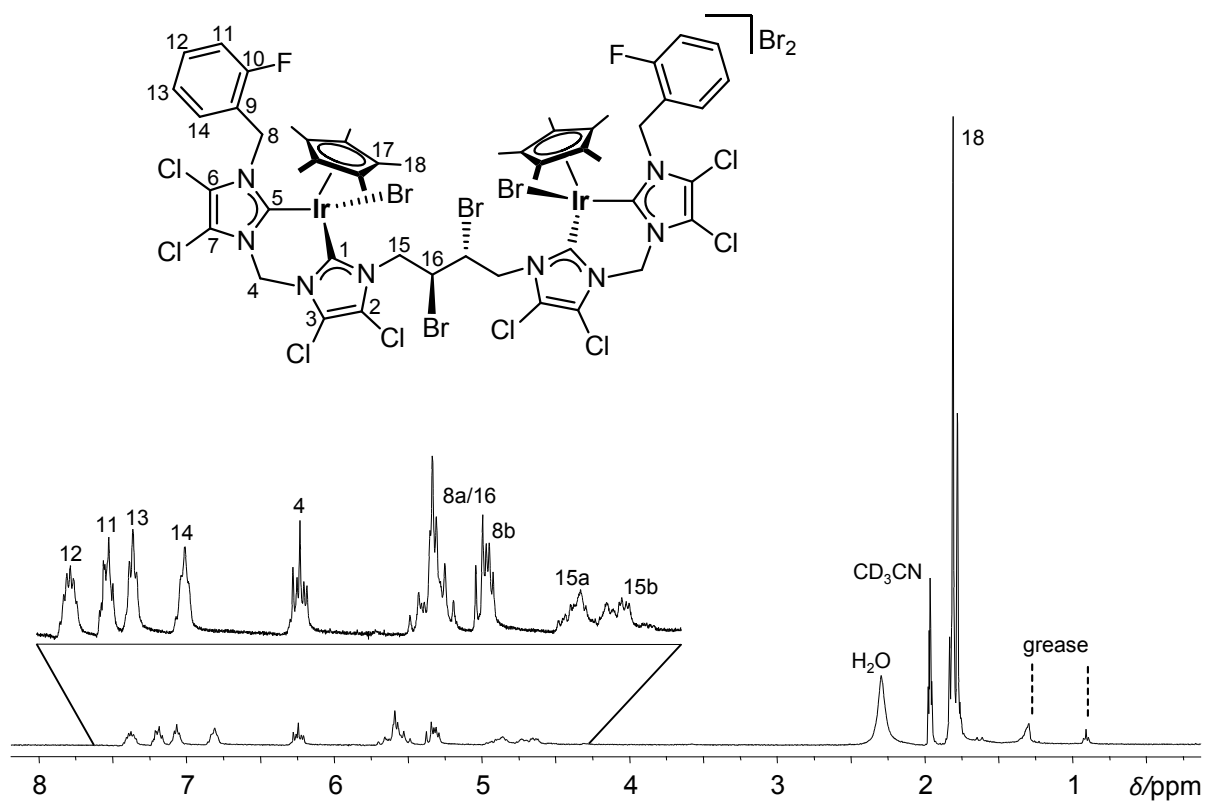

**Figure S27.**  $^1\text{H}$  NMR spectrum of complex  $11\text{Br}_2$  in  $\text{CD}_3\text{CN}$ .

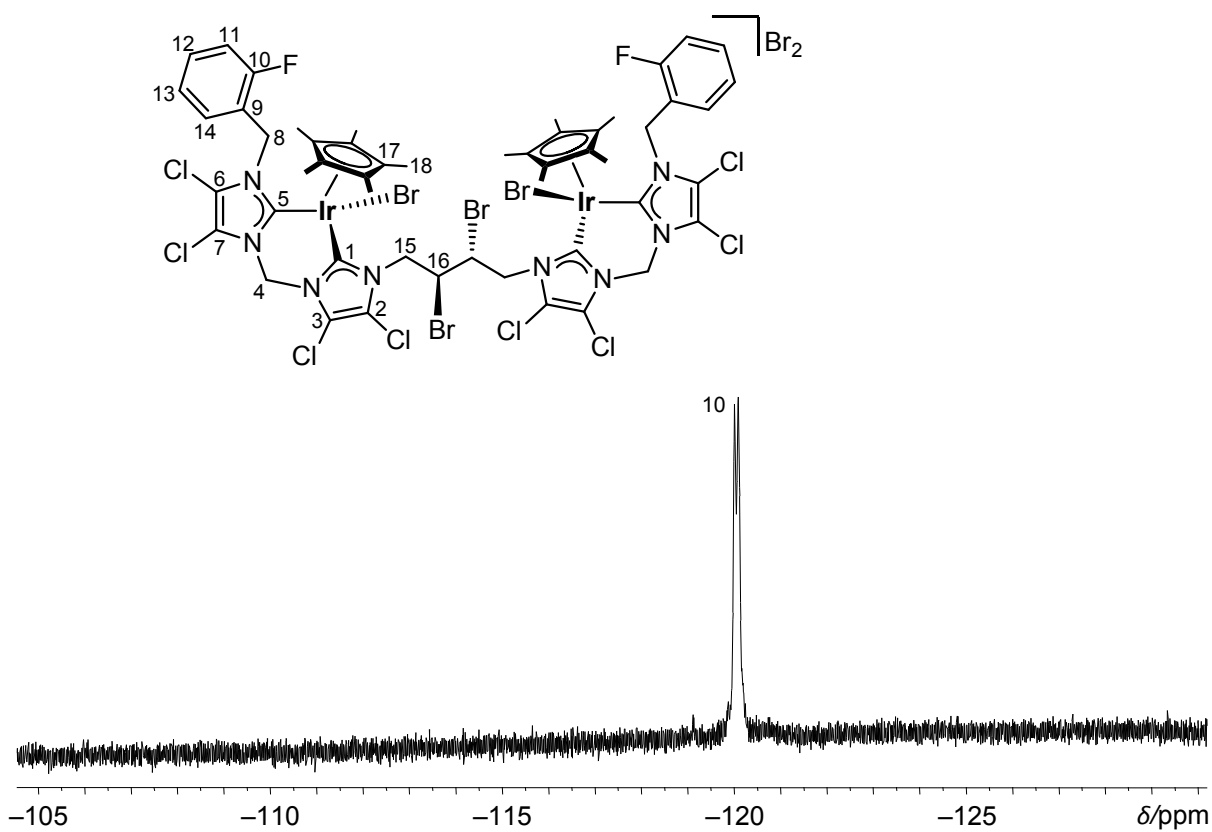

**Figure S28.**  $^{19}\text{F}\{^1\text{H}\}$  NMR spectrum of complex  $11\text{Br}_2$  in  $\text{CD}_3\text{CN}$ .

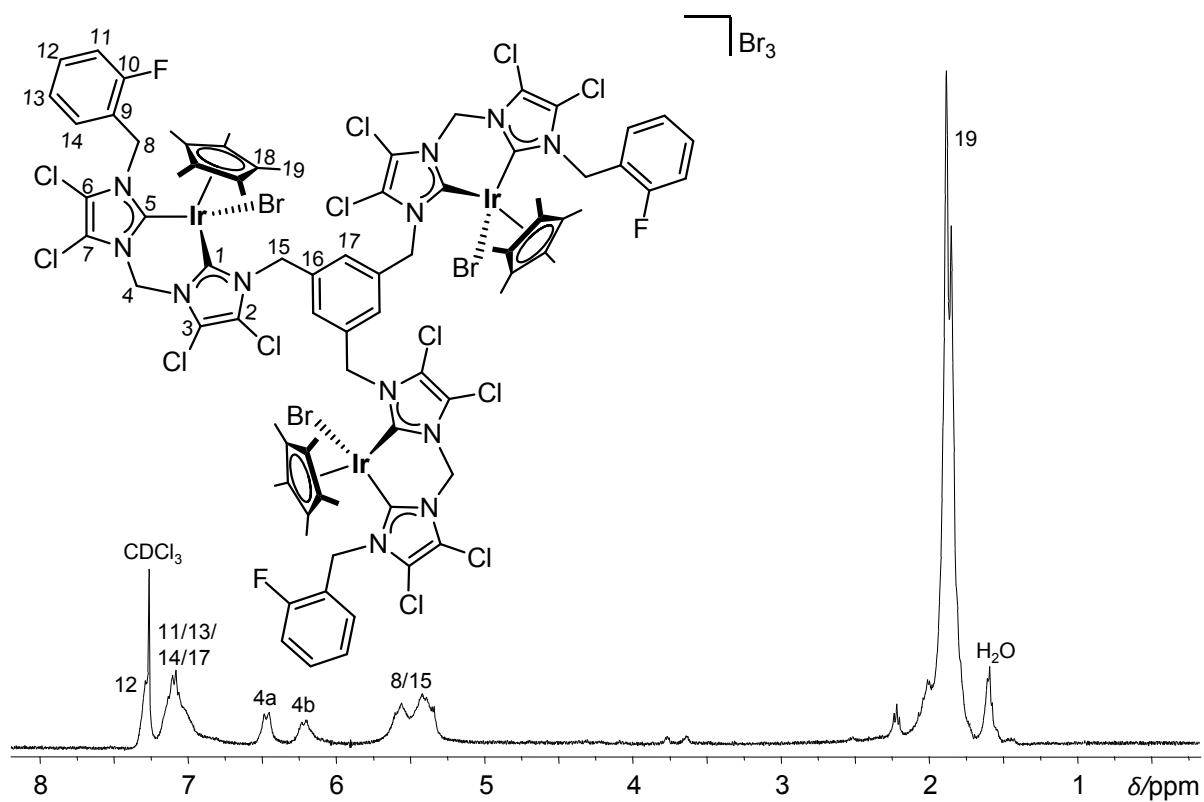

**Figure S29.**  $^1\text{H}$  NMR spectrum of complex  $12\text{Br}_3$  in  $\text{CDCl}_3$ .

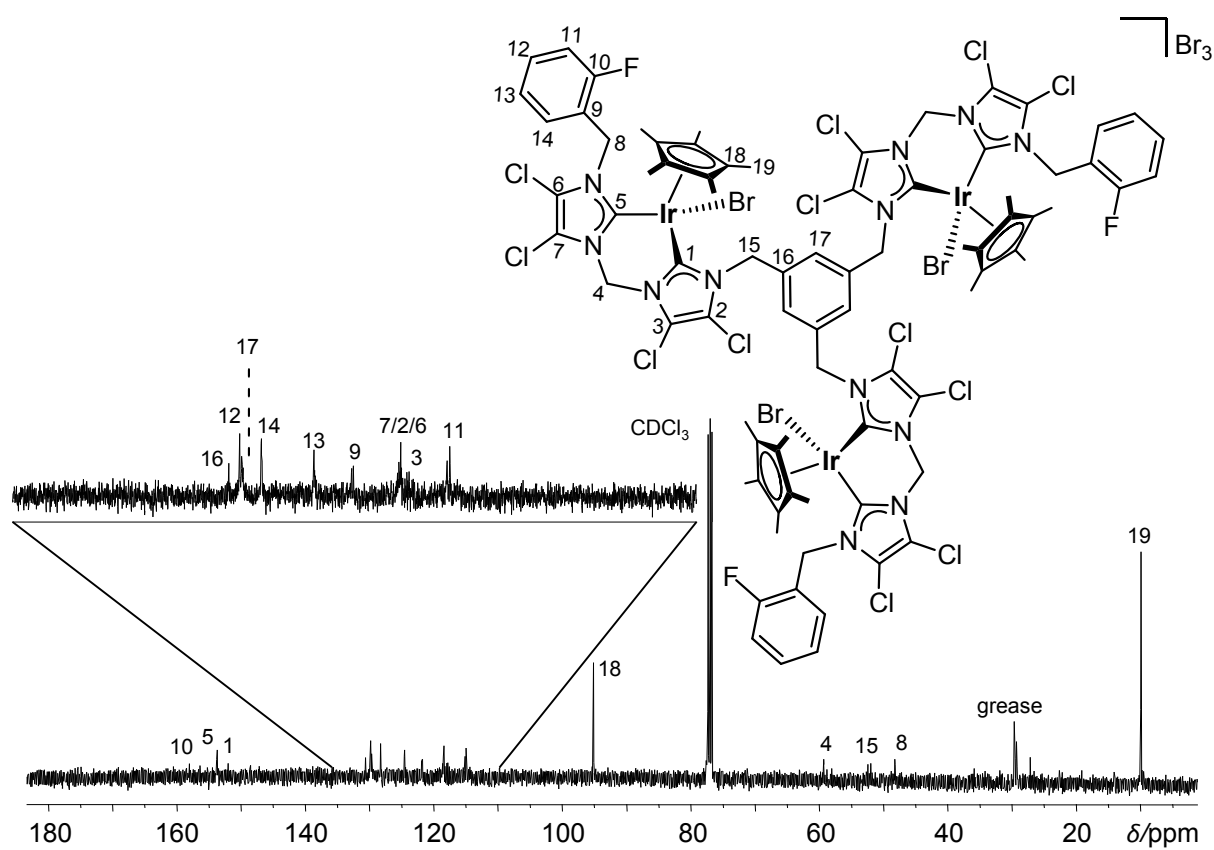

**Figure S30.**  $^{13}\text{C}\{^1\text{H}\}$  NMR spectrum of complex  $12\text{Br}_3$  in  $\text{CDCl}_3$ .

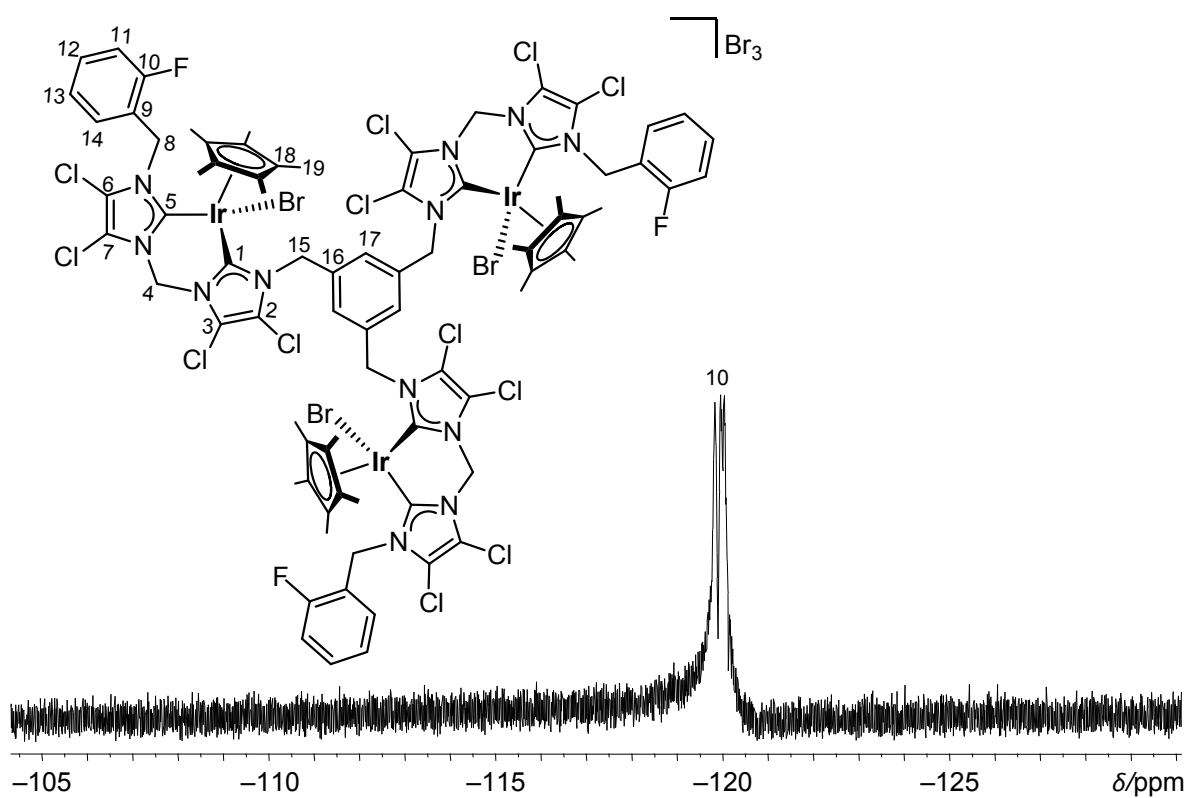

**Figure S31.** <sup>19</sup>F{<sup>1</sup>H} NMR spectrum of complex **12Br<sub>3</sub>** in CD<sub>3</sub>CN.

#### 4. Addition of Br<sub>2</sub> to *trans*-1,4-dibromo-2-butene

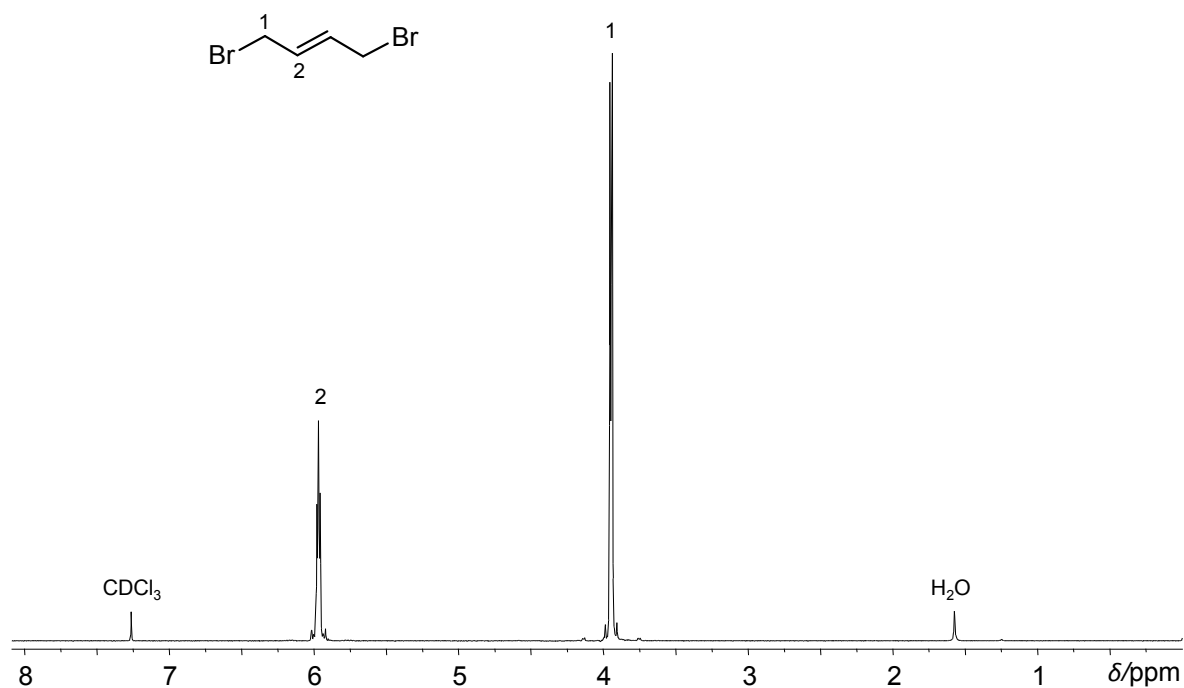

**Figure S32.** <sup>1</sup>H NMR spectrum of *trans*-1,4-dibromo-2-butene in CDCl<sub>3</sub>.

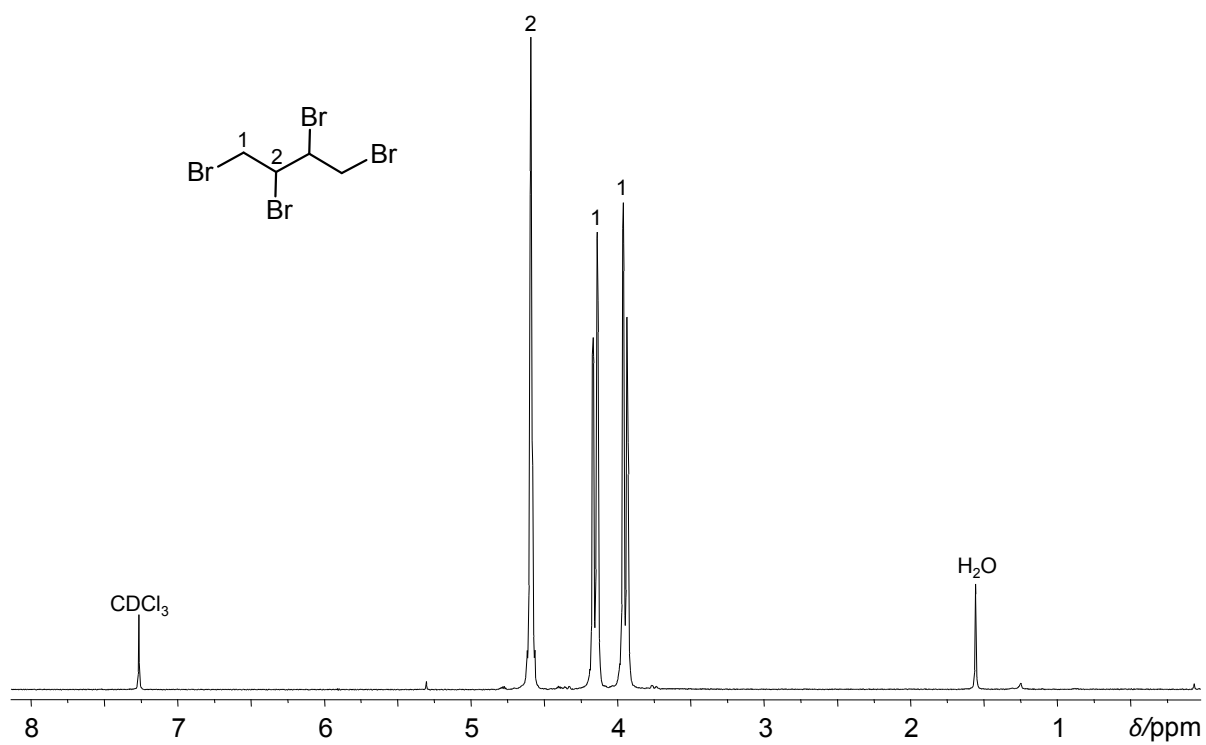

**Figure S33.** <sup>1</sup>H NMR spectrum of 1,2,3,4-tetrabromobutane in CDCl<sub>3</sub>.

## 5. HR-ESI Mass Spectra

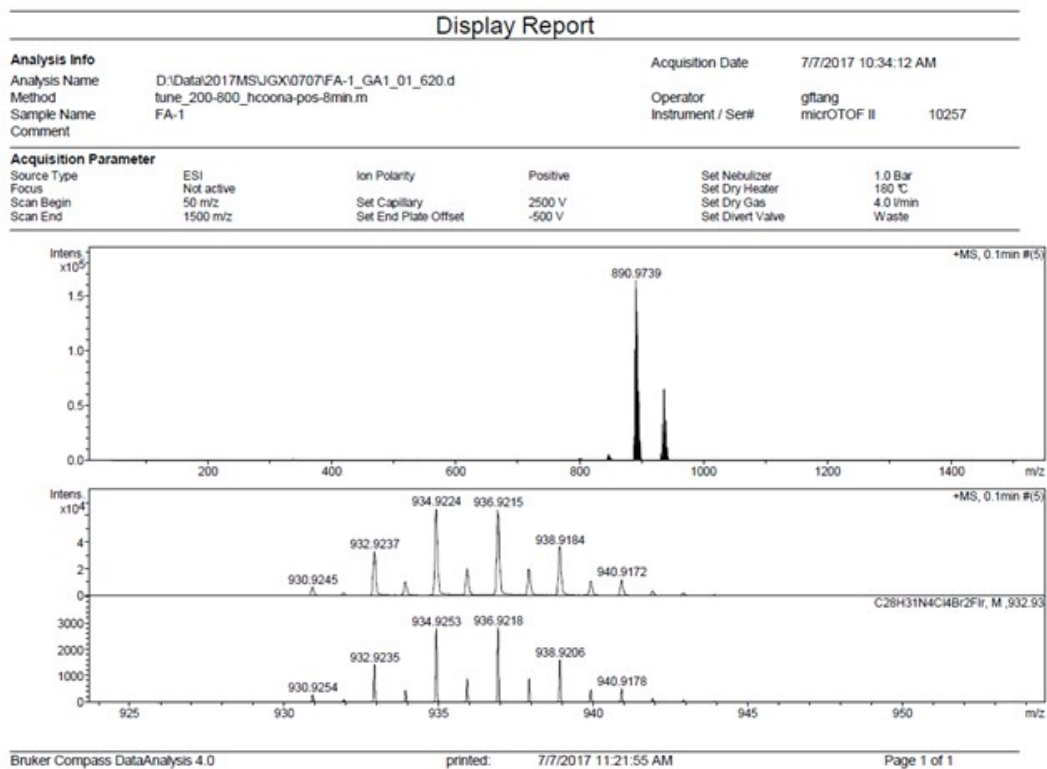

**Figure S34.** HR-ESI mass spectrum of complex **3Br** in CH<sub>3</sub>OH.

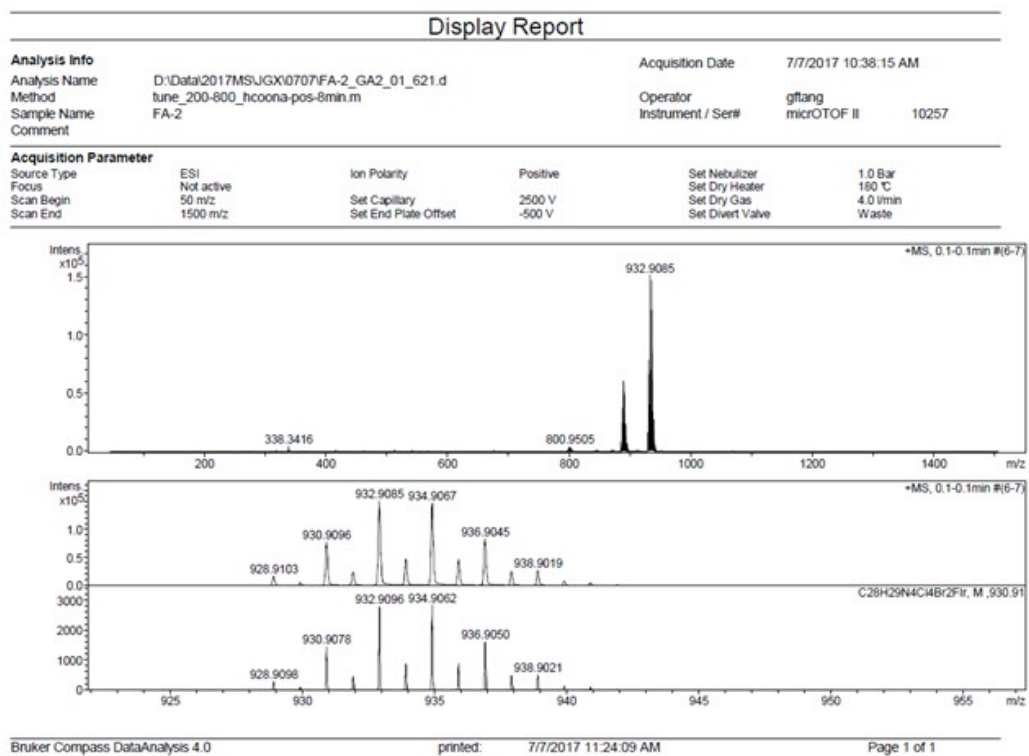

**Figure S35.** HR-ESI mass spectrum of complex **4Br** in CH<sub>3</sub>OH.



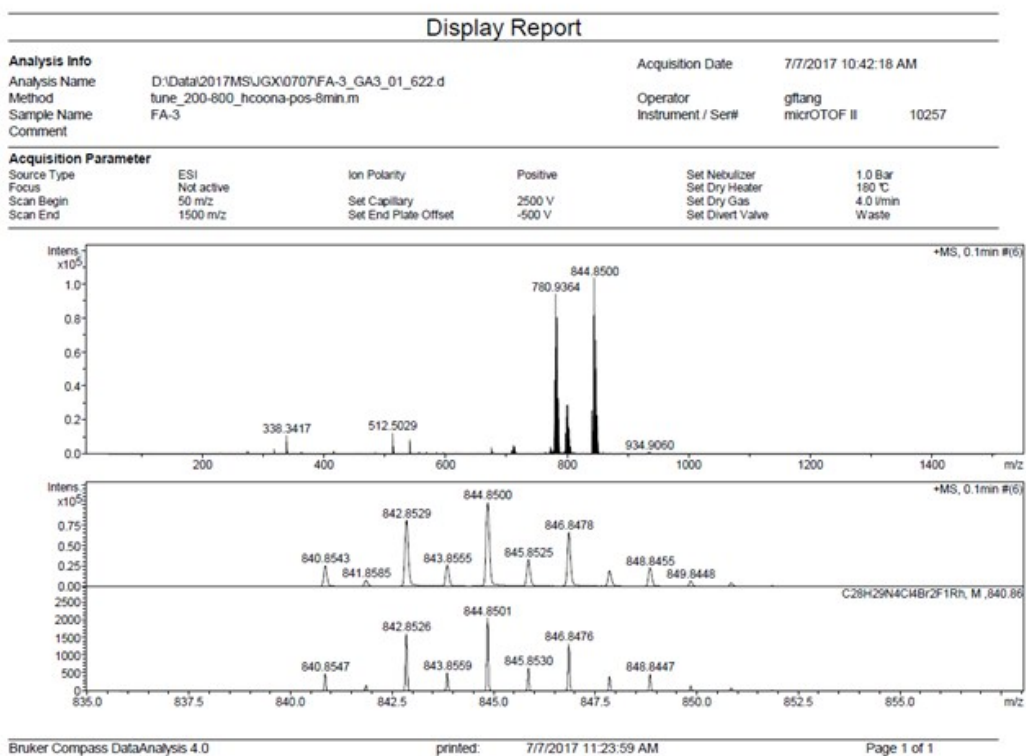

**Figure S36.** HR-ESI mass spectrum of complex **5Br** in CH<sub>3</sub>OH.

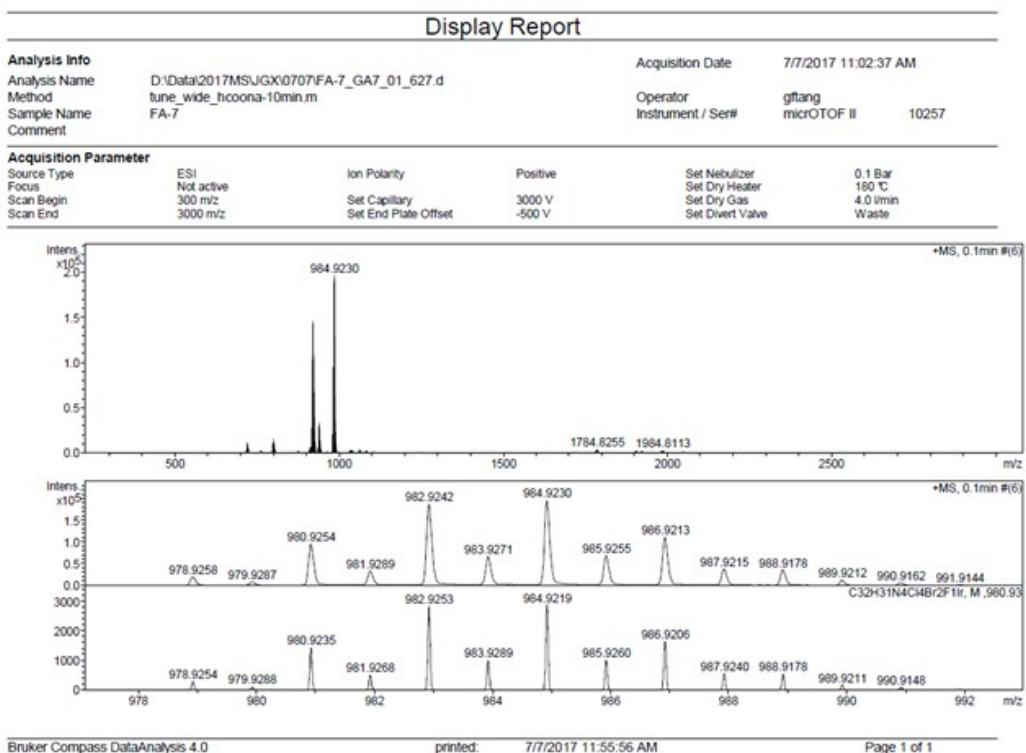

**Figure S37.** HR-ESI mass spectrum of complex **6Br** in CH<sub>3</sub>OH.

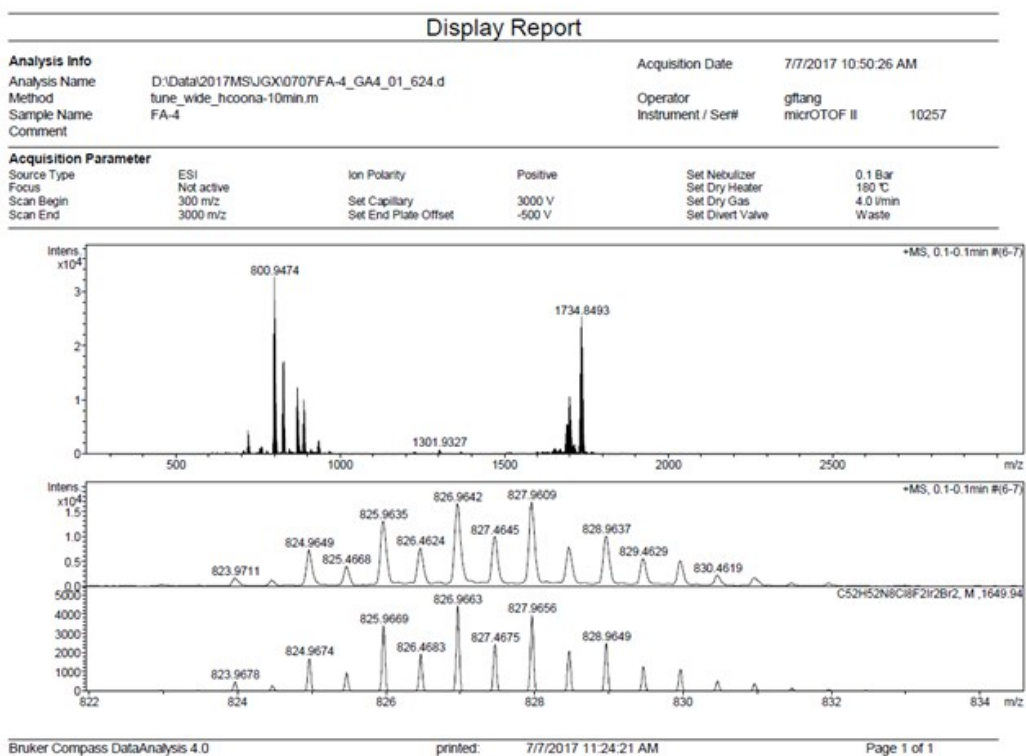

**Figure S38.** HR-ESI mass spectrum of complex  $7Br_2$  in  $CH_3OH$ .

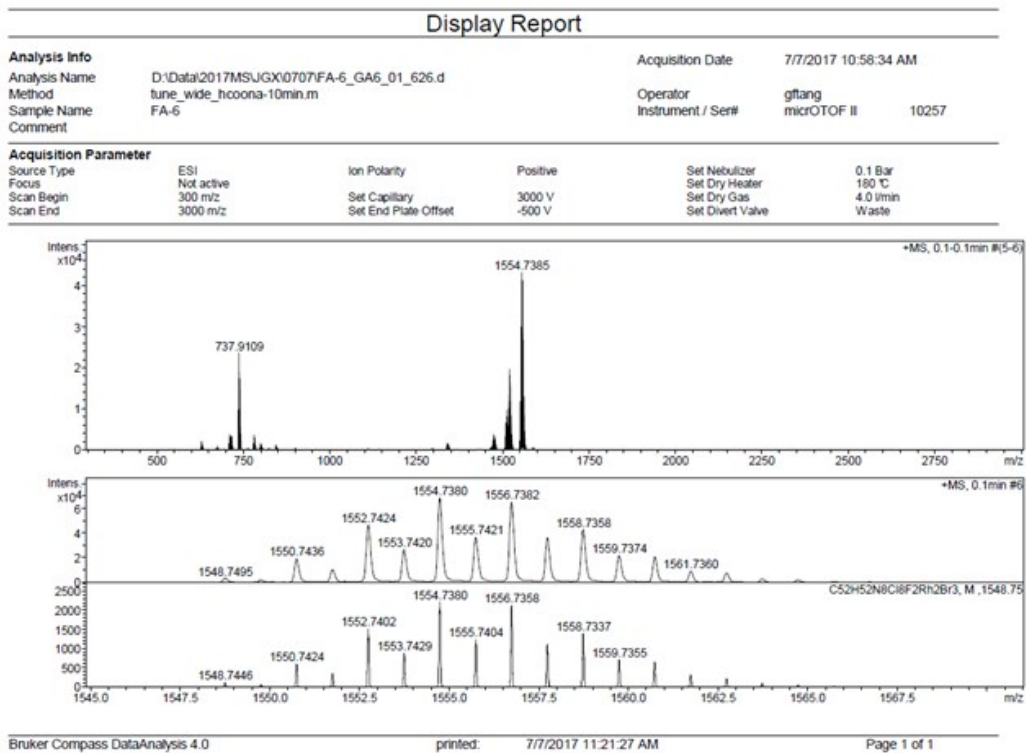

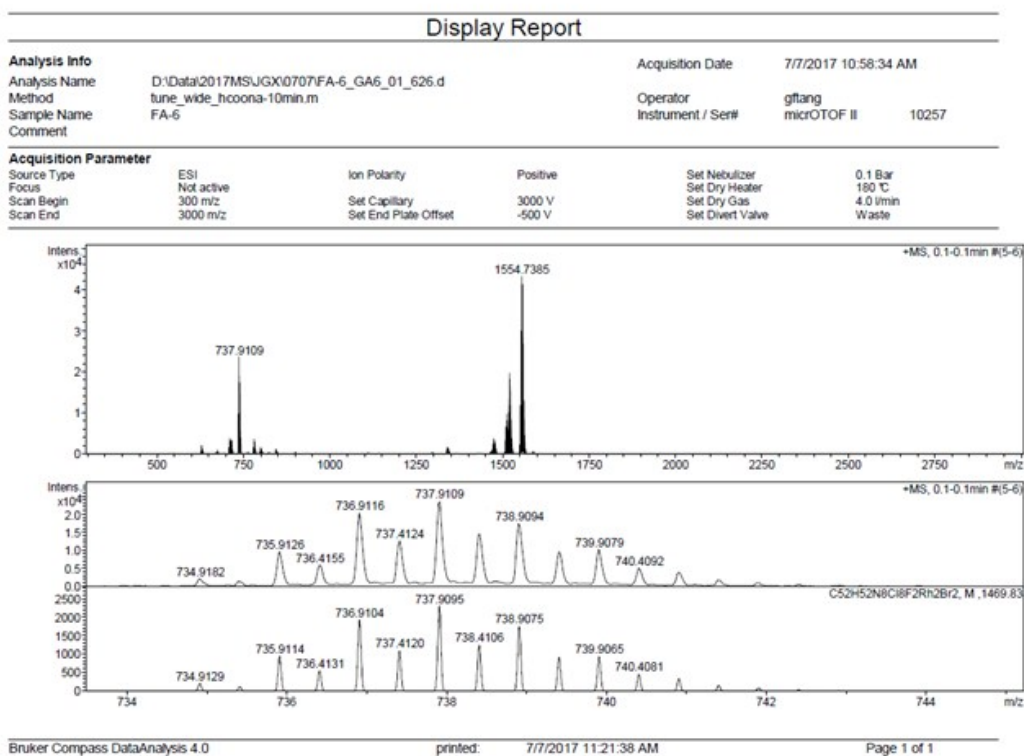

**Figure S39.** HR-ESI mass spectra of complex  $8Br_2$  in  $CH_3OH$ .

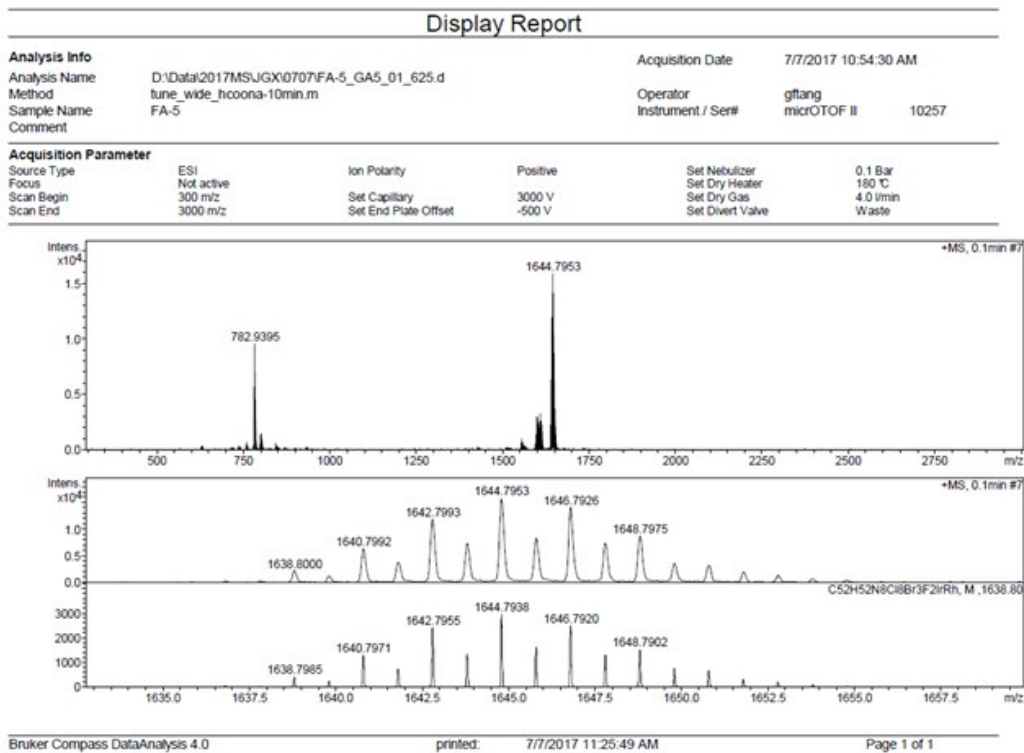

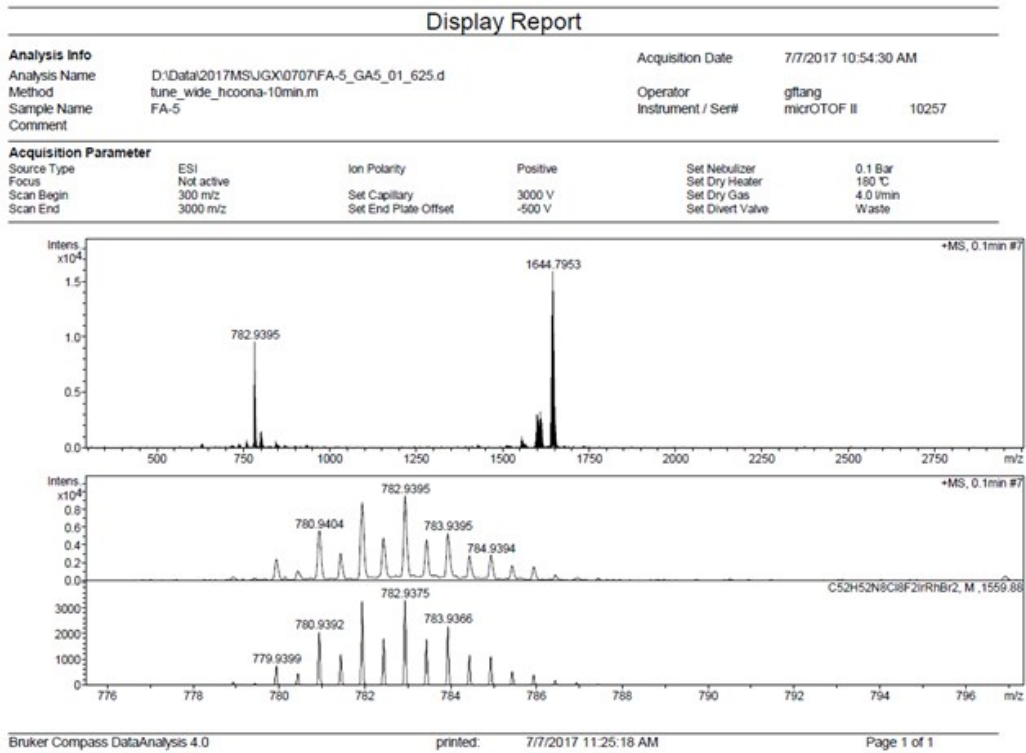

**Figure S40.** HR-ESI mass spectra of complex  $9Br_2$  in  $CH_3OH$ .

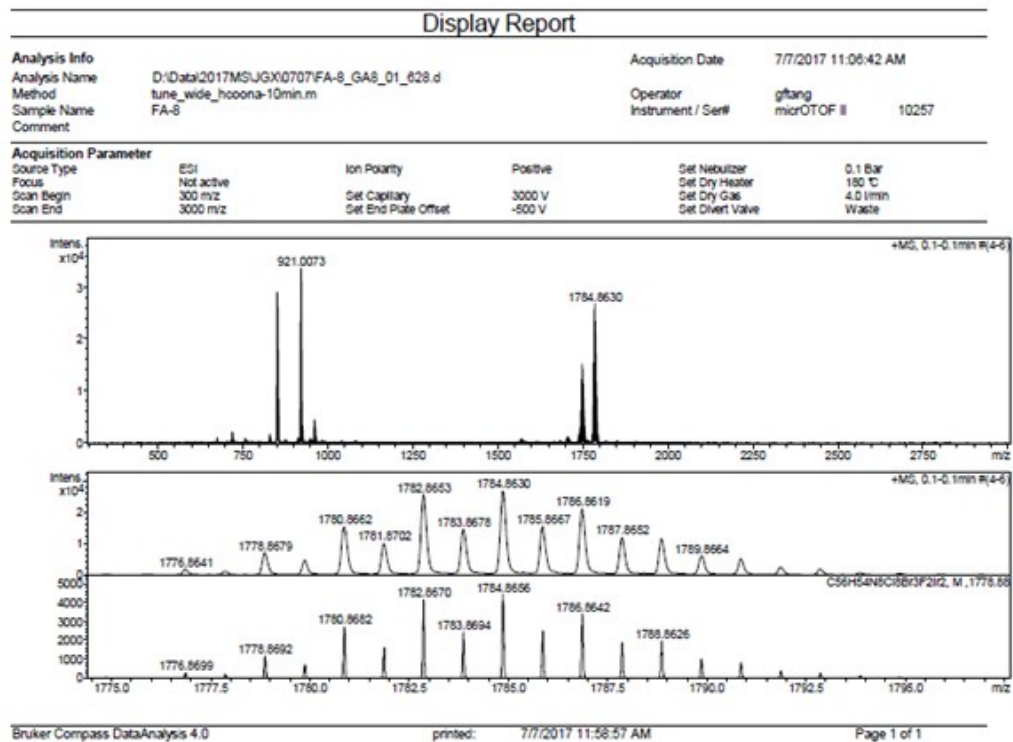

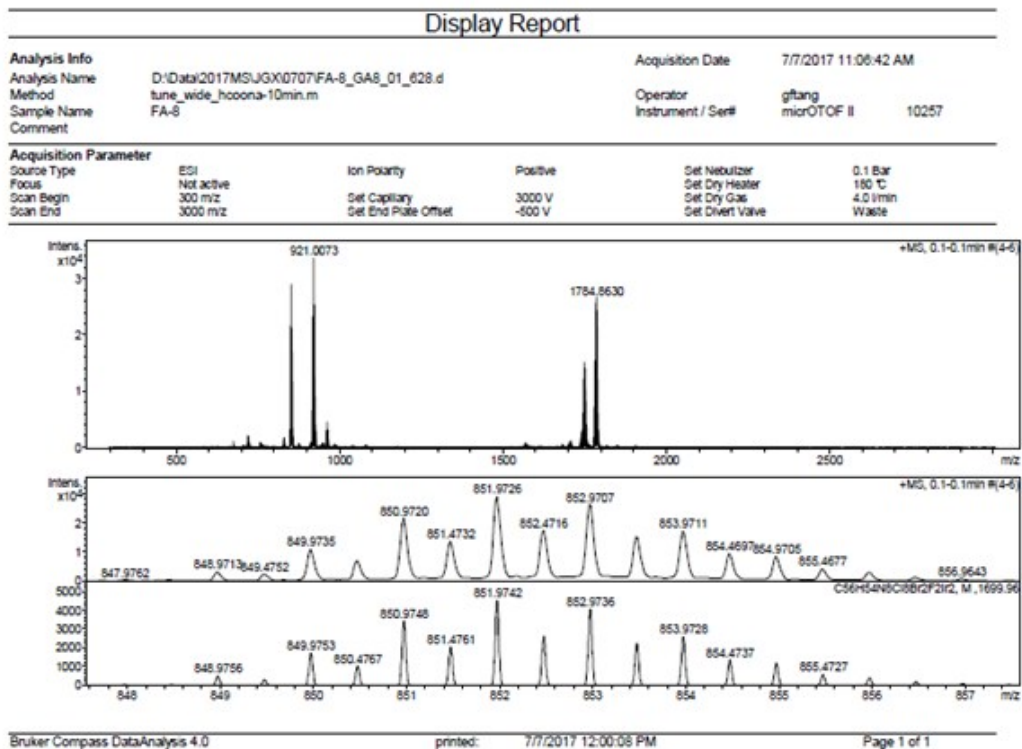

**Figure S41.** HR-ESI mass spectra of complex  $10\text{Br}_2$  in  $\text{CH}_3\text{OH}$ .

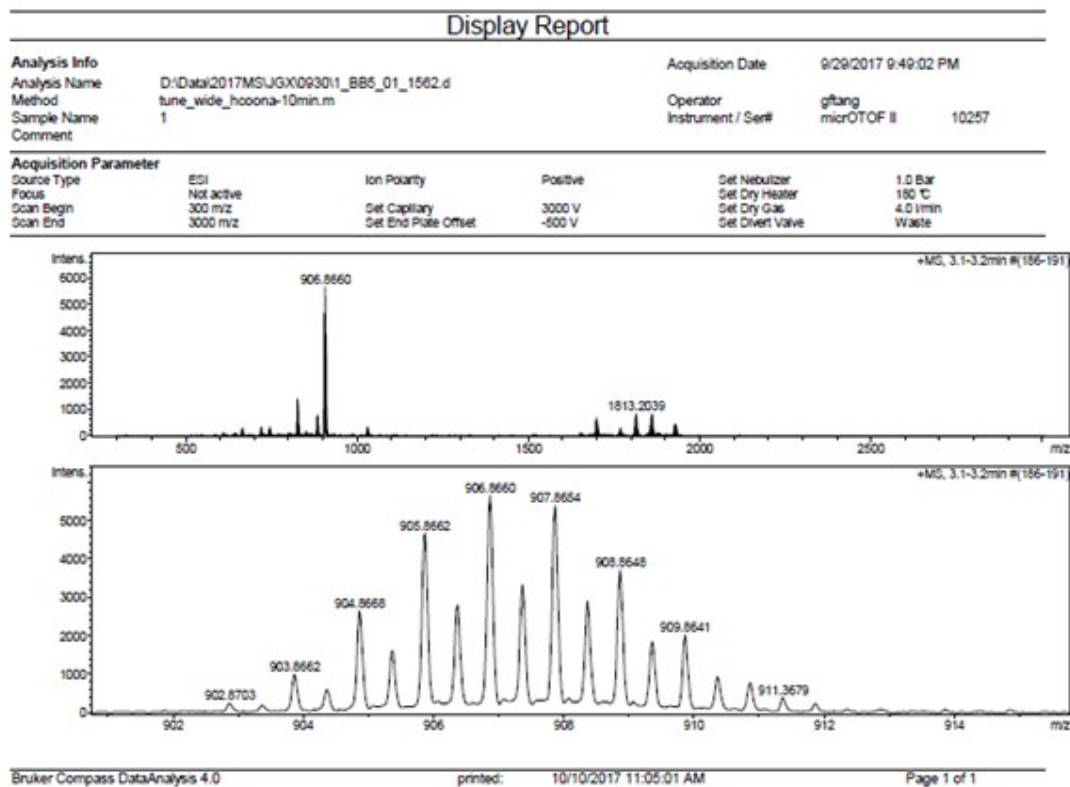

**Figure S42.** HR-ESI mass spectrum of complex  $11\text{Br}_2$  in  $\text{CH}_3\text{OH}$ .

## Display Report

|                      |                                       |                   |                       |  |
|----------------------|---------------------------------------|-------------------|-----------------------|--|
| <b>Analysis Info</b> |                                       | Acquisition Date  | 9/29/2017 10:20:39 PM |  |
| Analysis Name        | D:\Data\2017MSUGX\0930H_BB6_01_1565.d | Operator          | gfang                 |  |
| Method               | tune_wide_hcoona-10min.m              | Instrument / Ser# | microTOF II 10257     |  |
| Sample Name          | 4                                     |                   |                       |  |
| Comment              |                                       |                   |                       |  |

|                              |            |                      |          |                  |           |
|------------------------------|------------|----------------------|----------|------------------|-----------|
| <b>Acquisition Parameter</b> |            |                      |          |                  |           |
| Source Type                  | ESI        | Ion Polarity         | Positive | Set Nebulizer    | 1.0 Bar   |
| Focus                        | Not active | Set Capillary        | 3000 V   | Set Dry Heater   | 150 °C    |
| Scan Begin                   | 300 m/z    | Set End Plate Offset | -500 V   | Set Dry Gas      | 4.0 l/min |
| Scan End                     | 3000 m/z   |                      |          | Set Divert Valve | Waste     |

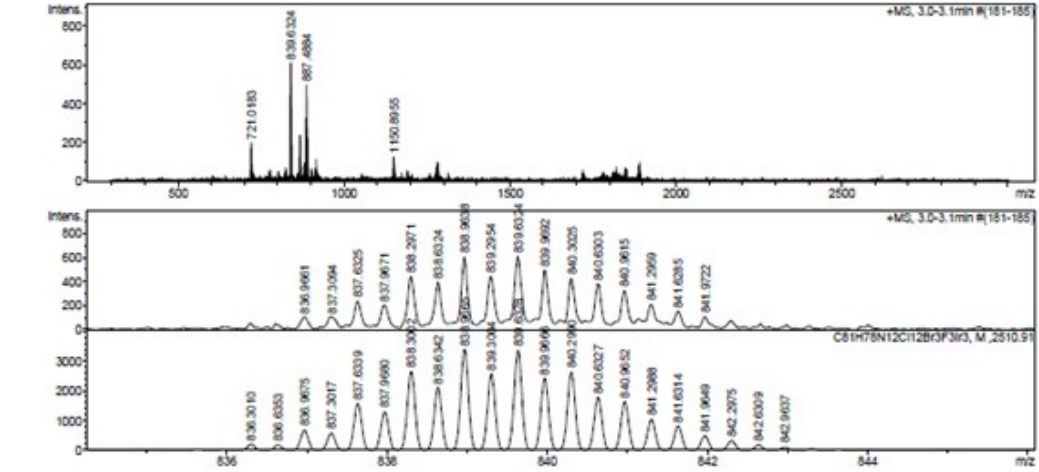

Bruker Compass DataAnalysis 4.0

printed: 10/10/2017 11:22:58 AM

Page 1 of 1

**Figure S43.** HR-ESI mass spectrum of complex **12Br<sub>2</sub>** in CH<sub>3</sub>OH.

## 6. References

1. a) F. Aznarez, P. J. Sanz Miguel, T. T. Y. Tan and F. E. Hahn, *Organometallics*, 2016, **35**, 410; b) F. Aznarez, M. Iglesias, A. Hepp, B. Veit, P. J. Sanz Miguel, L. A. Oro, G.-X. Jin and F. E. Hahn, *Eur. J. Inorg. Chem.*, 2016, **28**, 4598.
2. APEX-II Bruker AXS Inc., Madison, Wisconsin, USA, 2011.
3. SHELXL-2014/7: G. M. Sheldrick, *Acta Crystallogr. Sect. A*, 2008, **64**, 112.
